1 Transcriptome profiling reveals CD73 and age-driven changes in neutrophil responses against

2 *Streptococcus pneumoniae*

3 Manmeet Bhalla\*, Lauren R. Heinzinger\*, Olanrewaju B. Morenikeji†, Brandon Marzullo‡,

4 Bolaji N. Thomas† and Elsa N. Bou Ghanem\*<sup>1,2</sup>

5 **Author Affiliations:** \*Department of Microbiology and Immunology, State University of New  
6 York at Buffalo School of Medicine, 14203, Buffalo, NY, USA

7 †Department of Biomedical Sciences, College of Health Sciences and Technology, Rochester  
8 Institute of Technology, 14623, Rochester, NY, USA

9 ‡Department of Biochemistry and Center of Excellence in Bioinformatics and Life Sciences,  
10 State University of New York at Buffalo, 701 Ellicott St., 14203, Buffalo, NY, USA

11 **Running title:** CD73 mediated JNK/AP-1 regulation of PMN function

12 **Keywords:** RNA-Seq, PMNs, pneumonia, extracellular adenosine, JNK/AP-1, MAPK, aging,  
13 pneumococcus

14 **Conflict of interest:** The authors have declared that no conflict of interest exists

15

16

---

<sup>1</sup> This work supported by National Institute of Health grant R00AG051784 and a University at Buffalo Clinical and Translational Science Institute pilot award CTSA1153519 to ENBG. OBM was supported by an American Association of Immunologists Careers in Immunology fellowship and a College of Health Sciences and Technology bridge grant.

<sup>2</sup> Elsa N. Bou Ghanem, 955 Main Street, Buffalo, NY, 14203. Telephone: 716-829-2422. Email: [elsaboug@buffalo.edu](mailto:elsaboug@buffalo.edu)

17 **Abstract**

18           Neutrophils are required for host resistance against *Streptococcus pneumoniae* but their  
19 function declines with age. We previously found that CD73, an enzyme required for antimicrobial  
20 activity, is down-regulated in neutrophils from aged mice. This study explored transcriptional  
21 changes in neutrophils induced by *S. pneumoniae* to identify pathways controlled by CD73 and  
22 dysregulated with age. Ultrapure bone marrow-derived neutrophils isolated from wild type (WT)  
23 young, old, and CD73KO young mice were mock-challenged or infected with *S. pneumoniae ex*  
24 *vivo*. RNA sequencing was performed to identify differentially expressed genes (DEGs). We found  
25 that infection triggered distinct global transcriptional changes across hosts, that were strongest in  
26 CD73KO neutrophils. Surprisingly, there were more down-regulated than up-regulated genes in  
27 all groups upon infection. Down-regulated DEGs indicated a dampening of immune responses in  
28 old and CD73KO hosts. Further analysis revealed that CD73KO neutrophils expressed higher  
29 numbers of long non-coding RNAs (lncRNAs) compared to WT controls. Predicted network  
30 analysis indicated that CD73KO specific lncRNAs control several signaling pathways. We found  
31 that genes in the JNK-MAPK-pathway were up-regulated upon infection in CD73KO and WT old  
32 but not in young mice. This corresponded to functional differences, as phosphorylation of the  
33 downstream AP-1 transcription factor component c-Jun was significantly higher in infected  
34 CD73KO and old mice neutrophils. Importantly, inhibiting JNK/AP-1 rescued the ability of these  
35 neutrophils to kill *S. pneumoniae*. Altogether, our findings revealed that neutrophils modify their  
36 gene expression to better adapt to bacterial infection and that this capacity declines with age and  
37 is regulated by CD73.

38

39

## 40 **Introduction**

41 *Streptococcus pneumoniae* (pneumococcus) is an opportunistic pathogen that normally  
42 resides in the human nasopharynx but has the capacity to cause life-threatening infections that  
43 result in more than a million deaths annually (1). Pneumococcal infections are particularly a  
44 problem for elderly individuals. Despite the availability of vaccines and antibiotic therapies, *S.*  
45 *pneumoniae* remain a leading cause of community-acquired bacterial pneumonia in individuals  
46 above 65 years of age (2). According to a recent Active Bacterial Core surveillance report,  
47 individuals  $\geq 50$  years of age accounted for 71% of *S. pneumoniae* cases and 82% of associated  
48 deaths (3). Novel interventions are thus required to prevent a significant loss of life in the elderly  
49 and to combat the health and economic burden posed by this infection (4).

50 Neutrophils (also known as polymorphonuclear leukocytes or PMNs) play a central role in  
51 the clearance of *S. pneumoniae* infections. We and others found that PMNs are required for host  
52 resistance against pneumococcal infections (5-7) as depletion of PMNs prior to pneumococcal  
53 pulmonary challenge results in significantly higher bacteria burden in the lungs and increases  
54 lethality (7). It is well known that PMN antibacterial function declines with age (8, 9). We  
55 previously found that this could be recapitulated in mouse models where we observed a significant  
56 decrease in opsonophagocytic killing of *S. pneumoniae* by PMNs isolated from old mice compared  
57 to young controls (10). Strikingly, adoptive transfer of PMNs from young mice reversed the  
58 susceptibility of aged mice to pneumococcal pneumonia (10). This emphasizes the importance of  
59 PMNs in immunity and highlights their potential as targets for interventions that boost resistance  
60 of elderly hosts against infection. However, the host pathways that drive the age-associated decline  
61 in PMN function remain to be fully elucidated.

62           The extracellular adenosine (EAD) pathway plays an important role in host resistance to  
63 pneumococcal infection (7). Upon infection, ATP released by damaged or injured cells is  
64 converted into EAD by the sequential action of two extracellular enzymes: CD39 which converts  
65 ATP to AMP and CD73 which then dephosphorylates AMP to EAD (11). We previously found  
66 that genetic ablation or pharmacological inhibition of CD73 in mice results in higher pulmonary  
67 pneumococcal loads and systemic spread of infection (7). CD73 is required for the ability of PMNs  
68 to kill *S. pneumoniae* as PMNs isolated from young CD73KO mice fail to kill pneumococci *ex*  
69 *vivo* (7, 10, 12) . Importantly, age-driven changes in EAD pathway impair PMN anti-bacterial  
70 function. PMNs from old mice express significantly less CD73 than PMNs from young controls  
71 and supplementation with EAD reverses the age-driven decline in the ability of PMNs to kill *S.*  
72 *pneumoniae* (10).

73           The aim of this study was to investigate how aging impairs the antimicrobial activity of  
74 PMNs and what aspect of this is regulated by CD73. Although it was previously thought that PMNs  
75 are transcriptionally quiescent cells that kill bacteria with pre-packaged antimicrobial compounds,  
76 recent work has demonstrated that PMNs also undergo significant changes in their transcriptome  
77 in response to inflammation and bacterial infection (13, 14). Therefore, we examined global  
78 transcriptional changes in PMNs in response to *S. pneumoniae* infection *ex vivo* and how these  
79 responses are altered with aging and the absence of CD73. We found that infection with *S.*  
80 *pneumoniae* significantly altered the transcriptional profiles of PMNs from all host groups and  
81 that, importantly, active transcription was required for the ability of PMNs to kill bacteria.  
82 Surprisingly, we found that many more genes were down-regulated than up-regulated in response  
83 to infection. Down-regulated genes indicated a dampening of pro-inflammatory immune responses  
84 in PMNs from CD73KO and wild type (WT) old, but not in young hosts. Interestingly, higher

85 numbers of long non-coding RNAs (lncRNAs) were found to be differentially expressed in PMNs  
86 from CD73KO mice compared to the PMNs from WT mice upon pneumococcal challenge.  
87 Predicted network analysis of these lncRNAs indicated that various immune signaling pathways  
88 are potentially regulated downstream of the EAD pathway. We also found an increased expression  
89 of Mitogen Activated Protein Kinase (MAPK) signaling pathway genes in PMNs from old and  
90 CD73KO but not young hosts. We confirmed that the activation of c-Jun N-terminal  
91 kinase/Activator protein-1 (JNK/AP-1), one of the MAPK- signaling pathways, was significantly  
92 up-regulated in PMNs from CD73KO and old mice compared to young controls in response to *S.*  
93 *pneumoniae* infection. Importantly, pharmacological inhibition of JNK/AP-1, reversed the defect  
94 in pneumococcal killing by PMNs from old and CD73KO mice, indicating that this pathway can  
95 potentially be targeted to reverse the age-related dysregulation of PMN responses.

96

97

98

99

100

101

102

103

104

105

106

107

108 **Materials and Methods**

109 **Mice.** Wild type (WT) young (4 months) and old (22-24 months) C57BL/6 mice were purchased  
110 from Jackson Laboratories (Bar Harbor, ME) and the National Institute on Aging colonies. CD73  
111 knock-out (CD73KO) mice on a C57BL/6 background (15) were purchased from Jackson  
112 Laboratories and bred at a specific-pathogen free facility at the University at Buffalo. Young (4  
113 months) CD73KO mice were used. Due to the limited availability of aged animals, male mice were  
114 used in all experiments. This work was performed in accordance with the recommendations from  
115 the Guide for Care and Use of Laboratory Animals published by the National Institutes of Health.  
116 All procedures were reviewed and approved by the Institutional Animal Care and Use Committee  
117 at the University at Buffalo.

118 **Bacteria.** *S. pneumoniae* TIGR4 AC316 strain (serotype 4) (16) was a kind gift from Andrew  
119 Camilli. Bacteria were grown at 37°C in 5% CO<sub>2</sub> in Todd-Hewitt broth supplemented with 0.5%  
120 yeast extract and oxyrase until cultures reached the mid-exponential phase. Aliquots were frozen  
121 at -80°C in growth media with 20% (v/v) glycerol. Aliquots were thawed on ice, washed, and  
122 diluted in PBS prior to use. Bacterial CFU were enumerated by serial dilution and dribble plating  
123 on TSA agar plates supplemented with 5% sheep blood (Northeast Laboratory).

124 **PMN isolation.** Femurs and tibias of uninfected mice were flushed with RPMI 1640 supplemented  
125 with 10% FBS and 2 mM EDTA, and bone marrow cells were resuspended in PBS as described  
126 previously (12). PMNs were obtained through density gradient centrifugation using Histopaque  
127 1119 and Histopaque 1077 as previously described (17). This method yields PMNs with 85-90%  
128 purity (12). To obtain ultrapure PMNs for RNA sequencing, negative selection EasySep Mouse  
129 Neutrophil Enrichment kit (StemCell#19762) was used following the manufacturer's protocol.  
130 PMN purity was determined through flow cytometry and > 98% of cells were Ly6G<sup>+</sup> (Fig S1).

131 **PMN infection and total RNA extraction.** Ultrapure PMNs were isolated from young WT, old  
132 WT and young CD73KO mice. From each mouse,  $10^6$  ultrapure PMNs were either infected with  
133 *S. pneumoniae* TIGR4 strain (MOI of 4) opsonized with 3% homologous mouse sera or mock-  
134 treated with 3% sera in buffer alone for 40 minutes at 37°C. Three mice per strain were used to  
135 obtain three distinct biological replicates of infected and mock-treated PMNs for a total of 18  
136 samples. Following bacterial challenge, RNA was extracted from PMNs using RNeasy Mini Kit  
137 (Qiagen) as per the manufacturer's protocol. TURBO deoxyribonucleic acid (DNA)-free kit  
138 (Invitrogen) was used to digest DNA from the samples. RNA concentrations and 260/280 ratios  
139 were determined using NanoDrop 1000 (Thermo Fischer Scientific).

140 **Illumina library preparation and RNA sequencing.** Agilent 2100 Bioanalyzer was used to  
141 determine the integrity, purity and concentration of RNA samples. RNA integrity (RIN) score of  
142 6.5 or above was considered acceptable for further analysis. Quality check revealed improper  
143 fragmentation of one sample (one mock-infected CD73KO sample), which was omitted from  
144 further analysis. Total RNA was enriched for mRNA using poly-(A)-selection (Illumina). NEB  
145 stranded RNA library prep kit (NEB) and NEB Ultra II RNA library prep kit (NEB) were used to  
146 prepare complementary DNA (cDNA) libraries for the remaining 17 samples, according to  
147 manufacturer's protocol. RNA sequencing was carried out on an Illumina HiSeq2500 (Illumina)  
148 with a mid-output 75-cycle paired end with 10-20 million reads per sample at the Genomics and  
149 Bioinformatics core facility at the University at Buffalo. Details of the RNA samples along with  
150 RNA concentration and RIN score are provided in Supplementary Table I.

151 **Differential gene expression analysis.** Per-cycle basecall (BCL) files generated by the Illumina  
152 HiSeq2500 were converted to per-read FASTQ files using bcl2fastq version 2.20.0.422 with  
153 default settings. FastQC version 0.11.5 was used to review the sequencing quality while FastQ

154 Screen version 0.11.1 was used to determine any potential contamination. FastQC and FastQ  
155 Screen quality reports were summarized using MultiQC version 1.5 (18). Genomic alignments  
156 were performed using HISAT2 version 2.1.0 using default parameters (19). To differentiate  
157 between bacterial vs mammalian RNA, the resulting reads were aligned to NCBI GRCh38 as the  
158 reference genome. Sequence alignments were compressed and sorted into binary alignment map  
159 (BAM) files using samtools version 1.3. Counting of mapped reads for genomic features was  
160 performed using Subread FeatureCounts version 1.6.2 (20) (parameters:-s2-g gene\_id -t exon -Q  
161 60) and the annotation file specified with (-a) was the NCBI GRCh38 reference provided by  
162 Illuminas iGenomes. MultiQC software was used to summarize alignment as well as feature  
163 assignment statistics (18). Differentially expressed genes were detected using the Bioconductor  
164 package DESeq2 version 1.20.0 (21). Genes with one count or less were filtered out, and alpha  
165 was set to 0.05. Log2 fold-changes were calculated using DESeq2 using a negative binomial  
166 generalized linear models, dispersion estimates, and logarithmic fold changes integrated with  
167 Benjamini-Hochberg procedure to control the false discovery rate (FDR). A list of differentially  
168 expressed genes (DEGs) was generated through DESeq2. We defined a significant up- or down-  
169 regulation as a (fold change)  $\geq 2$  with FDR value  $< 0.05$ . The PCA plots were generated in ggplot2  
170 package and the volcano plots were made using the Bioconductor package EnhancedVolcano.  
171 **Gene ontology (GO) enrichment analysis.** Functional enrichment analysis of significantly up- or  
172 down-regulated DEGs was performed on the Database for Annotation, Visualization and  
173 Integrated Discovery (DAVID) (22) using the default settings. For each comparison, gene  
174 functions were categorized into biological process, molecular function, and cellular components.  
175 These gene functions were analyzed separately for up- or down-regulated DEGs. DAVID was used  
176 to further perform pathway analysis and to retrieve pathway maps based on the identified DEGs.



177 All functional categories and pathways with  $p$ -value  $< 0.05$  were considered significant. The  
178 complete data are available as Supplementary material and on NCBI website with accession  
179 number GSE150811.

180 **LncRNA network analysis.** In order to elucidate the possible function and biological process of  
181 long non-coding RNAs (lncRNAs) identified in this screen, we performed computational  
182 prediction of the potential lncRNA-target interaction. LncRNAs bind to complementary sequence  
183 of neighboring or target genes to repress expression. Thus, if a lncRNA is up-regulated, it is  
184 predicted to down-regulate the expression of the target gene and vice versa. We performed  
185 computational prediction of lncRNA-target interactions using LncTar software for prediction of  
186 lncRNA-RNA interactions through free energy minimization. Using the normalized binding free  
187 energy (ndG), we selected a value of -0.02 as cutoff for the analysis as previously described (23).  
188 In order to confirm the reliability of our prediction analysis, we further used LncRRIssearch, an  
189 online server for prediction of lncRNA-target interaction to validate the result from the previous  
190 analysis. Briefly, we searched the genomic location of all our lncRNAs from the mouse genome  
191 (GRCm38.p6) and nucleotide sequences of the lncRNAs and their neighboring genes were  
192 retrieved for prediction of potential lncRNA-RNA interactions. In order to gain understanding of  
193 the possible biological process and physiological pathways, we catalogued all potential target  
194 genes and performed functional enrichment analysis to identify significantly affected pathways  
195 using a combination of gene ontology (GO) term, PANTHER and KOBAS  
196 (<http://kobas.cbi.pku.edu.cn/kobas3>) as previously described (24, 25). Networks were then  
197 generated indicating the likelihood of the focus lncRNAs, gene targets and biological process in  
198 the network being found together by chance including concomitant lncRNAs co-regulating one or

199 more targets (26). The networks, pathways, and biological functional classification were generated  
200 using Cytoscape version 3.7.2.

201 **RNA sequencing data accession number.** The data presented and discussed in this manuscript  
202 along with all the RNA sequencing files and raw data files have been deposited in the NCBI's  
203 Gene Expression Omnibus (GEO), and is accessible through GEO Series accession number  
204 GSE150811 (<https://www.ncbi.nlm.nih.gov/geo/query/acc.cgi?acc=GSE150811>).

205 **Real time PCR.** RT-PCR was used to validate the expression of some of the differentially  
206 expressed genes identified in RNA sequencing. For this, the same RNA samples previously used  
207 to prepare Illumina libraries were used. Following treatment with indicated inhibitors and  
208 challenge with *S. pneumoniae*, RNA was extracted from  $1 \times 10^6$  PMNs/condition and DNA  
209 digested as described above. For all RT-PCR reactions, 500 ng of each sample was converted into  
210 cDNA using Super-Script VILO™ cDNA synthesis kit (Life Technologies) according to the  
211 manufacturer's protocol. RT-PCR was performed using CFX96 Touch™ Real-Time PCR  
212 Detection System from Bio-Rad. CT (cycle threshold-values) were determined using the following  
213 TaqMan probes from Life Technologies (Thermo Fischer Scientific): GAPDH  
214 (Mm99999915\_m1), IL-10 (Mm01288386\_m1), c-FOS (Mm00487425\_m1), Cybr4  
215 (Mm01144487\_m1), Hsp72 (Mm01159846\_s1), Rgl1 (Mm00444088\_m1), ADOR2B  
216 (Mm00839292\_m1), Rrad (Mm00451053\_m1), Tnip1 (Mm01288484\_m1), DUSP1  
217 (Mm00457274\_g1), c-JUN (Mm00495062\_s1), Nr4a1 (Mm01300401\_m1), Sifn1  
218 (Mm00624380\_m1), Tubb6 (Mm00660543\_m1), and Atf3 (Mm00476032\_m1). All samples  
219 were run in duplicates. Data were analyzed by the comparative threshold cycle ( $2^{-\Delta CT}$ ) method,  
220 normalizing the CT values obtained for target gene expression to those for GAPDH of the same  
221 sample. For comparison of expression levels upon infection, relative quality of transcripts (RQ)

222 were calculated by the  $\Delta\Delta\text{CT}$  method by using the formula  $\text{RQ} = 2^{-(\Delta\Delta\text{CT})}$  (27).  $\Delta\Delta\text{CT}$  values were  
223 obtained by using the formula  $\Delta\Delta\text{CT} = \Delta\text{CT}_{\text{infected}} - \Delta\text{CT}_{\text{uninfected}}$ .

224 **Opsonophagocytic killing assay (OPH).** The ability of PMNs to kill *S. pneumoniae* ex vivo was  
225 measured using a well-established OPH killing assay as previously described (7, 10, 12, 28).  
226 Briefly,  $1 \times 10^5$  PMNs were incubated with  $1 \times 10^3$  bacteria grown to mid-log phase and pre-  
227 opsonized with 3% mouse sera in 100 $\mu\text{l}$  reactions of HBSS containing 0.1% gelatin. Reactions  
228 were then rotated at 37°C for 45 minutes. Where indicated, PMNs were incubated with  
229 Actinomycin D (transcription inhibitor), Cycloheximide (translation inhibitor), Anisomycin (JNK  
230 stimulator), SR11302 (AP-1 inhibitor), JNK-IN-8 (JNK inhibitor), or HBSS (vehicle control) for  
231 30 minutes prior to infection. Anisomycin and SR11302 were purchased from Tocris Biosciences  
232 and Actinomycin D, Cycloheximide and JNK-IN-8 from Sigma. Percent killing was determined  
233 by dribble plating on blood agar plates and calculated in comparison to the no PMN control under  
234 the same conditions (+/- treatments).

235 **Phosphorylated c-Jun measurement.** The ability of *S. pneumoniae* to induce phosphorylation of  
236 c-Jun was measured by flow cytometry. Briefly,  $5 \times 10^5$  PMNs were challenged with pre-opsonized  
237 *S. pneumoniae* TIGR4 at MOI of 4 in 100 $\mu\text{l}$  reactions of HBSS containing 0.1% gelatin. Reactions  
238 were then rotated at 37°C for indicated time points. Where indicated, PMNs were incubated with,  
239 Anisomycin (JNK stimulator), SR11302 (AP-1 inhibitor), JNK-IN-8 (JNK inhibitor), or HBSS  
240 (vehicle control) for 30 minutes prior to infection. Following incubation, cells were fixed with  
241 Cytotfix (BD Bioscience) and permeabilized by ice cold methanol. Cells were then stained for  
242 fluorophore-tagged antibodies against Ly6G (BD Bioscience # 5605991), phospho c-Jun (Ser73)  
243 (Cell Signaling # 12714S) (29) and total c-Jun (Cell Signaling # 15683S) at 1:50 dilutions per

244 manufacturer's protocol. Fluorescence intensities were measured on a BD Fortessa and at least  
245 10,000 events were analyzed using FlowJo.

246 **Flow cytometry.** Anti-Ly6G (IA8, BioLegend) antibodies were used to determine the purity of  
247 isolated PMNs. Staining was performed in the presence of Fc-block (BD Bioscience).  
248 Fluorescence intensities were measured on a BD Fortessa and at least 2,000 events were analyzed  
249 using FlowJo.

250 **Statistics.** OPH and flow cytometry data were analyzed using Prism8 (Graph Pad). Bar graphs  
251 represent the mean values +/- SD. 1-sample t-test or Student's t-test were used to determine  
252 significant differences as indicated. Correlation of mRNA expression by RNA-Seq and qPCR was  
253 assessed by Pearson correlation analysis. All *p*-values less than 0.05 were considered significant  
254 (as indicated by asterisks).

255

256

257

258

259

260

261

262

263

264

265

266

267 **Results**

268 **Active transcription and translation are important for the ability of PMNs to kill *S.***  
269 ***pneumoniae***

270 We previously reported that PMNs from old mice fail to efficiently kill *S. pneumoniae*, in  
271 part due to a decline in the surface expression of CD73 and extracellular adenosine production  
272 (10). In this study, we wanted to explore whether CD73 and age-driven changes in the  
273 transcriptome impair PMN antimicrobial function. As PMNs are known to have antimicrobial  
274 products pre-synthesized and packaged during maturation for rapid immune response (30), we  
275 investigated the importance of active transcription and translation in the ability of PMNs to kill *S.*  
276 *pneumoniae*. To do this, we used a well-established *ex vivo* opsonophagocytic killing assay (7, 31)  
277 where we isolated PMNs (Ly6G<sup>+</sup>) from the bone marrow of young C57BL/6 wild type (WT) mice  
278 and treated them with either Actinomycin D (transcription inhibitor (32)) or Cycloheximide  
279 (translation inhibitor (33)) at concentrations that do not impair cellular viability (32, 34) prior to  
280 infection with *S. pneumoniae*. We found that treating PMNs with Actinomycin D caused a  
281 significant 2-fold decrease in bacterial killing compared to vehicle control (VC), while treatment  
282 with Cycloheximide completely abrogated the ability of PMNs to kill bacteria and instead enabled  
283 bacterial growth in the presence of PMNs (Fig. 1A). These findings suggest that active  
284 transcription of new mRNAs and formation of new proteins is crucial for optimal anti-  
285 pneumococcal responses.

286

287 **Profiling of mRNA expression**

288 We wanted to test whether there are age-related changes in mRNA expression that renders  
289 PMNs ineffective in their antimicrobial function. In addition, we were interested in investigating

290 whether any of the age-driven changes were shared by PMNs that lack CD73. We first re-  
291 confirmed that aging and lack of CD73 significantly blunts the ability of PMNs to kill *S.*  
292 *pneumoniae ex vivo* (Fig. 1B). Next, RNA sequencing was used to compare the transcriptional  
293 profiles of PMNs from young WT, old WT, and young CD73KO mice at baseline and upon  
294 infection. For RNA isolation, we obtained an ultrapure PMN population (approximately 99%  
295 purity, Fig S1) from the bone marrow of mice using negative selection (see materials and methods).  
296 Three mice were used per strain. Efficient killing of pneumococci by PMNs from young controls  
297 requires opsonization (35). Therefore, to more closely mimic *in vivo* conditions and the  
298 opsonophagocytic killing assay (Fig. 1B), PMNs isolated from each mouse were either challenged  
299 with *S. pneumoniae* TIGR4 strain (at a multiplicity of infection or MOI 4) opsonized with  
300 homologous mouse sera from the same mouse for 40 minutes or mock-challenged with sera  
301 containing buffer. We focused on the 40-minute time point as this is a standard time used in *ex*  
302 *vivo* killing assays (7, 10, 12) and it allows us to examine differences in antimicrobial function  
303 (Fig. 1B), while maintaining PMN viability ( $\leq 20\%$  PMN necrosis (PI+), Fig. S4B). Detailed  
304 methods on ultrapure PMN isolation and subsequent RNA sequencing workflow are in the  
305 materials & methods section and summarized in Fig. 2A. Differentially expressed genes (DEGs)  
306 were analyzed using DESeq2 and significant differential expression of a gene was defined as  
307 expression with fold change value of  $\geq 2.0$  and a false discovery rate (FDR)  $< 0.05$ .

308

### 309 **Mock-infected PMNs from young, old and CD73KO mice show limited differences in mRNA** 310 **profiles**

311 To determine if there is an intrinsic age-driven change in expression of genes that shape  
312 antimicrobial responses, we compared mRNA expression profiles of mock-challenged PMNs from

313 old WT mice to that of young WT controls. Keeping the expression of PMNs from young WT  
314 mice as baseline, we found a total of 23 DEGs to be up-regulated in PMNs from old mice (Table  
315 I). Surprisingly, 15 of these DEGs corresponded to the category of either Immunoglobulin heavy  
316 chain variable regions or Immunoglobulin kappa chain variable region (Table I). mRNA levels of  
317 certain variable region genes have been previously shown to vary in PMNs, although these cells  
318 do not express immunoglobulins (36). PMNs from old WT mice also showed up-regulation of a  
319 few other genes including *Calca* (calcium regulation and cAMP activity), *Mt2* (metal ion  
320 regulation), *Ces1d* (lipase activity), *Col5a1* (type V collagen) and *C130026l21Rik* (unannotated  
321 lncRNA) (Table I). Interestingly, none of the genes known for their role in PMN antimicrobial  
322 function showed an age-driven differential expression under baseline conditions.

323 To determine if there is an intrinsic CD73-driven change in expression of genes that shape  
324 antimicrobial responses, we then compared mRNA expression profiles of mock-stimulated PMNs  
325 from young CD73KO mice to that of young WT mice. As shown in Table II, we noted that only 8  
326 genes that were differentially expressed in resting PMNs with an equal number of up-regulated  
327 and down-regulated DEGs. Up-regulated DEGs included *Gm11868* (a lncRNA with predicted  
328 histone demethylase activity in *Drosophila*), *Gm13456* (a pseudogene related with somatic muscle  
329 development activity in *Drosophila*), *Gm6548* (unannotated pseudogene), and *Ighv9-4*  
330 (corresponds to the category of Immunoglobulin heavy chain variable region). As expected, the  
331 down-regulated DEGs included *NT5E* (that encodes for CD73). Other down-regulated DEGs  
332 included *Fam63b* (ubiquitin carboxyl-terminal hydrolase activity), *Aqp9* (transmembrane  
333 transporter activity) and *Cyb5r4* (NADPH-cytochrome reductase activity). As observed in old  
334 mice, none of the known antimicrobial genes showed a differential expression in mock-challenged

335 CD73KO PMNs. In summary, we found limited differences in mRNA expression in mock-  
336 challenged PMNs from WT and CD73KO mice as well as across host age.

337

### 338 ***S. pneumoniae* induces global changes in transcriptome profiles**

339 We next wanted to determine whether *S. pneumoniae* infection induced any transcriptional  
340 changes in PMNs. To do that, the global transcriptome profiles of infected and mock-challenged  
341 PMNs were characterized for each mouse group. Principal Component Analysis (PCA) was done  
342 prior to and after pneumococcal infection to investigate changes in patterns of mRNA expression  
343 between the different groups. We found that infection with *S. pneumoniae* resulted in major  
344 transcriptome changes in all three PMN types (Fig. 2B). Analysis of PMNs from each mouse group  
345 clearly showed distinct patterns of mRNA expression between the mock-infected and infected  
346 samples with combined total variance of 49% (PC1 and PC2), suggesting a distinct response of  
347 PMNs to *S. pneumoniae*. In PMNs from all three mouse groups, the mock-challenged samples  
348 formed a cluster separate from the corresponding infected samples (Fig. 2B). When we compared  
349 infected PMNs across the different mouse groups, we found that while CD73KO PMNs showed  
350 variation, PMNs from young WT mice clustered distinctly from the corresponding old mice (Fig.  
351 2C). In summary, infection with *S. pneumoniae* triggers global changes in PMN transcriptome  
352 profiles that differed across host age.

353

### 354 **Genes and functional categories up-regulated in response to *S. pneumoniae***

355 We then explored the genes whose expression was up-regulated upon PMN infection and  
356 how this varied among the different host groups. By selecting DEGs with at least 2-fold change in  
357 expression compared to mock-infected controls for each mouse group, we surprisingly found only



358 a small number of genes (10 per group) that were up-regulated in PMNs from WT mice in response  
359 to pneumococcal challenge, regardless of age (Fig. 3A and 4A). In contrast, CD73KO PMNs  
360 showed the strongest transcription response to bacterial infection with 36 up-regulated genes (Fig.  
361 5A). Some of the up-regulated DEGs were common in PMNs from all three mouse groups (Fig.  
362 6A). The six overlapping DEGs (*Osm*, *Fos*, *Jun*, *Zfp36*, *Egr1* and *Atf3*) belonged to the categories  
363 of growth regulators, transcription factors and transcription and translation regulators. When we  
364 compared DEGs that were commonly up-regulated in PMNs from old WT and CD73KO, but not  
365 in young WT mice, we found only two DEGs (Fig. 6A): *Slfn1* that has a known role in cell  
366 proliferation and immune response and *Nr4a1*, a transcription factor. When examining the DEGs  
367 that were up-regulated in response to infection that were specific to CD73KO PMNs, we found  
368 increased expression of *Btg2* (regulation of cell cycle), *Zcchc4* (nucleic acid binding and  
369 methyltransferase activity), *Dusp1* (phosphatase activity), *Klhl42* (ubiquitin-protein transferase  
370 activity), *Snail* and *Hlx* (sequence specific DNA binding activity), *F3* (phospholipid binding and  
371 cytokine receptor activity), *Hspa1a* and *Hspa1b* (ubiquitin protein ligase binding and protein  
372 folding chaperone), *Tacstd2* (calcium signaling), and *Rhob* (GDP and GTP binding activity). A  
373 number of up-regulated DEGs from CD73KO PMNs belonged to the category of lncRNAs that  
374 have not been functionally annotated, thus their roles in cellular function are currently unknown.

375 We next grouped up-regulated genes into different functional categories (Supplementary  
376 Tables II, IV and VI). Overall, there was a significant overlap in the annotated processes between  
377 PMN from the three mouse groups with DEGs falling mainly into the categories of DNA binding,  
378 transcription regulation and transcription factor activity (Fig. 3C, 4C and 5C) as many of these  
379 DEGs are known to regulate gene expression either as co-activators, regulators or transcription  
380 factors (*Fos*, *Jun*, *Egr1*, *Atf3*, *Sertad3*, *Nr4a1*, *F3* and *Hlx*). These data indicate that upon challenge

381 with *S. pneumoniae*, PMNs may have undergone transcriptional reprogramming as indicated by  
382 up-regulation of genes involved in transcription activation or transcription regulation.

383

### 384 **Genes and functional categories down-regulated in response to *S. pneumoniae***

385 Genes whose expression was down-regulated upon PMN infection were examined  
386 including their variation among the different host groups. Interestingly, we found more genes (2-  
387 3-fold more) that were down-regulated than up-regulated in PMNs in response to infection in all  
388 mouse groups (Fig 3A, 4A, and 5A). A total of 56 genes were down-regulated in PMNs from  
389 young mice, while only 35 genes were down-regulated in PMNs from old mice in response to  
390 pneumococcal challenge (Fig. 3A and 4A). As observed with the up-regulated DEGs, CD73KO  
391 PMNs showed strongest transcriptional response following *S. pneumoniae* challenge with 67  
392 down-regulated DEGs (Fig. 5A). Overall, there was considerable overlap observed between PMN  
393 from the three mouse groups (Fig. 6B). The 24 overlapping DEGs belong to categories of immune  
394 and inflammatory response (*Tnfrsf3*, *Icam1*, *Sgkl*, *Prdm1*, *Cxcl16*, and *Prdm1*), MAPK-signaling  
395 (*Dusp4*), cell-surface signaling (*Adora2b*, *Trem1*, *P2ry10*, and *Itga5*), transcription regulation  
396 (*Jmy*, *Rora* and *Nab2*), microtubule organization (*Kif1a*), protein regulation (*Trim13*), cell cycle  
397 and cell-cell adhesion (*Avp1* and *Serp1b8*), actin cytoskeleton (*Phldb1*), podocyte function  
398 (*Schip1*), apoptosis (*Ggct*), metalloproteinase (*Astl*), embryonic development function and  
399 tumorigenesis (*Olfml3*) and Notch-signaling (*Chac1*). Comparison of DEGs that were commonly  
400 down-regulated in PMNs from old WT and CD73KO mice showed 6 overlapping down-regulated  
401 DEGs that were not differentially expressed in PMNs from young WT mice (Fig. 6B). These  
402 included *Tubb6* (microtubule organization), *Rgl1* (guanine nucleotide exchange factor), *Rrad*  
403 (GTPase activity), *Cd40* (immune and inflammatory response), *Tnfrsf1* (inflammatory response)

404 and *Emp1* (cell-cell interaction and cell proliferation). These findings point towards an overall age-  
405 related decrease in immune and inflammatory response, characteristics of which are also shared  
406 by CD73KO PMNs.

407 To further understand how CD73 regulates the transcriptional profile during infection, we  
408 examined the distribution of DEGs that were only down-regulated in CD73KO, but not in WT  
409 PMNs (Fig. 6B). These included migration related genes *Cxcr5* (C-X-C-chemokine receptor  
410 activity), *Ccl2* (CCR2 chemokine receptor binding), and *Icam4* (integrin binding); G-protein  
411 coupled receptors related genes *Slpr1* (G protein-coupled receptor binding) and *Gpr84* (G protein-  
412 coupled peptide receptor activity); GTP related genes *Gbp5* (GTP hydrolysis), *Rnd1* (GTPase  
413 activity), and *Tbc1d4* (GTPase activator activity); kinase related genes *Sdc4* (protein kinase C  
414 binding), *Itk* (Tyrosine kinase activity), *Nuak1* and *Pim2* (serine/threonine protein kinase activity);  
415 and genes involved in other processes *Bcl2a1a* (apoptotic process), *Gpatch3* (nucleic acid  
416 binding), *Clec2d* (transmembrane signaling receptor activity), *Lgmn* (endopeptidase activity), *Lfng*  
417 (acetylglucosaminyl transferase activity) and *F10* (calcium and phospholipid binding). These data  
418 suggest potential dysregulation in PMN migration in response to *S. pneumoniae* in the absence of  
419 CD73, which is consistent with our previous findings (7).

420 To elucidate the PMN responses dampened upon pneumococcal challenge in susceptible  
421 vs. resistant hosts, we compared the distribution of DEGs that were down-regulated in PMNs from  
422 young WT mice only but not in PMNs from old WT or CD73KO PMNs. These included *Dusp8*  
423 (tyrosine/serine/threonine phosphatase activity), *Ctla4* (negative regulator of T-cell responses),  
424 *Bhlhe40* (transcriptional repressor activity), *Tnfrsf8* (transmembrane signaling receptor activity),  
425 *Cish* (1-phosphatidylinositol-3-kinase regulator activity), *Rgs1* (GTPase activator activity) and  
426 *Jag2* (calcium ion binding and growth factor activity). These data suggest that select genes that

427 inhibit immune responses are down-regulated in young WT hosts to better respond to *S.*  
428 *pneumoniae* challenge.

429 We further categorized down-regulated genes into different functional categories  
430 (Supplementary Tables III, V and VII). As expected, many genes were shared by more than one  
431 functional category. Overall, the functional categories which were commonly down-regulated in  
432 all three PMN types included cellular response to lipopolysaccharide, inflammatory response,  
433 gamma-glutamylcyclotransferase activity, and genes coding components of cell-surface and  
434 external side of plasma membrane (Fig. 3B, 4B and 5B). Interestingly, PMNs from both old WT  
435 and CD73KO but not young WT mice showed down-regulation of NF- $\kappa$ B signaling regulation  
436 upon *S. pneumoniae* challenge. In summary, the majority of down-regulated DEGs across all three  
437 PMN types belonged to the categories of transcription regulators and immune regulators.

438

### 439 ***S. pneumoniae* induces changes in lncRNA expression in the absence of CD73**

440 Further analysis identified a total of 22 lncRNAs which were either significantly up- or  
441 down-regulated in CD73KO PMNs upon pneumococcal challenge (Fig. 7). We observed a lower  
442 number of lncRNAs (n=5) in WT PMNs from young mice (Fig 8), while PMNs from WT old mice  
443 had none. We made several searches in all available gene ontology (GO) and annotation databases  
444 and found to the best of our knowledge that these lncRNAs have not been previously functionally  
445 annotated. We therefore performed prediction and network analysis (see materials and methods)  
446 of CD73KO specific lncRNAs and found a total of 105 potential target interactions including 3  
447 genes (*Il10*, *Icam1* and *Rora*) identified in our RNA sequencing analysis (Fig 7 and Supplementary  
448 Table VIII). Since lncRNAs could directly bind to the target mRNA through complementary base  
449 pairing and thus determine the regulation of gene expression, we therefore inferred the biological

450 functions of our lncRNAs based on their direct interaction with the gene targets, which, in turn,  
451 perturb the biological process in the disease pathway. For example, *Gm37747* can bind to several  
452 gene targets including *Cers6-205*, *Atp8a1-207*, *Spc25*, *Lpr2*, *Il10*, *Icam1*, *Atf3* and *Ldb2-204* which  
453 perturb signal transduction, regulation of cell adhesion and cellular response to tumor necrosis  
454 factor. This would signify that *Gm37747* is an important lncRNAs in these pathways. Importantly,  
455 we identified 5 pathways (Longevity regulation pathway, MAPK signaling pathway, Apoptosis  
456 signaling pathway, Nuclear receptor transcription pathway and Metabolic pathway) which were  
457 regulated by these lncRNAs (Fig.7). Among the predicted biological processes (Fig.7) were  
458 several signaling pathways including Signal transduction by protein phosphorylation cascade,  
459 Positive regulation of MAPK, Interferon signaling, Cytokine signaling in immune system, Cellular  
460 response to Tumor Necrosis Factor, Positive regulation of protein kinase C and Negative  
461 regulation of protein kinase B signaling. For young WT PMNs, lncRNA network analysis  
462 predicted different target genes (Supplementary Table VIII) but only one biological process was  
463 found and it connected to *Reep3* in the network (Olfactory signaling pathway and cellular  
464 component organization or biogenesis) (Fig. 8). These findings suggest that during *S. pneumoniae*  
465 infection, expression of lncRNAs in PMNs is controlled by CD73.

466

### 467 **RT-PCR validation**

468 To validate our RNA sequencing data, we tested the expression of a subset of differentially  
469 expressed genes through RT-PCR. The selection of genes tested was based on following  
470 categories: role in PMN function (*Il10* and *Adora2b*), role in MAPK pathways (*Fos*, *Jun*, *Hspa1a*,  
471 *Atf3*) or selected randomly (*Rrad* and *Rgl1*). The same samples on which RNA sequencing was  
472 performed were converted to cDNA for RT-PCR validation. Data were analyzed by the

473 comparative threshold cycle ( $2^{-\Delta\Delta CT}$ ) method, normalizing the CT values obtained for target gene  
474 expression to those for GAPDH of the same sample. Average of fold change values of target  
475 mRNA expression in infected samples was calculated relative to un-infected controls and then  
476 converted to log<sub>2</sub> scale, as described for the RNA sequencing data. Multiple targets were tested in  
477 the CD73KO RNA samples as this group showed the strongest transcriptional response to *S.*  
478 *pneumoniae* challenge. Overall, the average log<sub>2</sub> fold change values obtained during RT-PCR and  
479 RNA sequencing were consistent for the tested target genes (Fig. S2A, Fig. 9C and 9D) with a  
480 Pearson correlation coefficient of 0.8632 and *p*-value <0.01 (Fig. S2B).

481

482 **The MAPK signaling pathway is differentially up-regulated in PMNs from CD73KO and old**  
483 **mice in response to *S. pneumoniae* infection**

484 DEGs significantly down-regulated or up-regulated in PMNs from young WT, old WT and  
485 CD73KO PMNs upon pneumococcal challenge were analyzed separately to identify pathways  
486 responsive to *S. pneumoniae* challenge. As the number of significant DEGs (FDR value < 0.05)  
487 identified was low, we first used a liberal approach to perform functional category analysis using  
488 DAVID where all functional categories and pathways with *p*-value < 0.05 were considered  
489 significant. We found that for PMNs from young WT mice, Autoimmune thyroid disease and  
490 Cytokine-cytokine receptor interaction pathway terms were down-regulated (Fig. 3B). No down-  
491 regulated KEGG pathway was observed in PMNs from old WT mice. In contrast, down-regulated  
492 pathways were identified in CD73KO PMNs (Table III) and included; Malaria, Cytokine-cytokine  
493 receptor interaction, Chemokine-signaling pathway, Allograft rejection, Cell adhesion molecules  
494 and Autoimmune thyroid disease (Fig. 5B). When comparing pathways that were up-regulated,  
495 we did not find any in PMNs from young WT mice. In contrast, in PMNs from old WT mice, the

496 up-regulated pathway terms included HTLV-1 infection, MAPK signaling pathway,  
497 Leishmaniasis and Colorectal cancer (Fig. 4C), while the up-regulated pathways in CD73KO  
498 PMNs included MAPK signaling pathway, Estrogen signaling pathway, HTLV-1 infection and  
499 Influenza A (Fig. 5C).

500       Importantly, PMNs from old WT and CD73KO mice shared two common up-regulated  
501 pathways including the MAPK signaling pathway (Fig. 9A and B). This pathway was also  
502 significantly up-regulated in CD73KO PMNs upon infection when the analysis was performed  
503 with FDR value < 0.05 criteria. KEGG analysis indicated that *S. pneumoniae* induced up-  
504 regulation of JNK as one of the common MAPK pathways in PMNs from old WT and CD73KO  
505 mice (Fig S3). We observed upregulation of *Fos* and *Jun* the components of activator protein-1  
506 (AP-1) transcription complex which is regulated downstream of JNK signaling (37). Differential  
507 expression of select genes (*Fos*, *Jun*, and *Hspa1a*) in this pathway upon infection of PMNs from  
508 WT old and CD73KO mice was further confirmed using RT-PCR (Fig 9 C and D). To determine  
509 whether changes at the gene expression levels translated to functional differences in JNK pathway  
510 signaling, we quantified the proportion of c-Jun that undergoes phosphorylation in response to  
511 pneumococcal challenge. When phosphorylated, c-Jun forms part of the AP-1 transcription factor  
512 complex that is activated downstream of JNK signaling (37). We found increased phosphorylation  
513 of c-Jun in response to *S. pneumoniae* infection (Fig. 10) and importantly the portion of c-Jun that  
514 was phosphorylated was significantly higher in infected PMNs from old WT and CD73KO mice  
515 in comparison to young controls (Fig. 10B). These findings demonstrate age and CD73-driven  
516 changes in MAPK signaling in PMNs in response to pneumococcal infection.

517



518 **Blocking JNK/AP-1 signaling pathway boosts bacterial killing in PMNs from old and**  
519 **CD73KO mice**

520 We then wanted to explore whether the age and CD73-driven changes in the JNK MAPK  
521 pathway had an effect on PMN function. The JNK/AP-1 signaling pathway is well known for its  
522 role in stress-induced apoptotic cell death (38-40). Therefore, we tested whether there were  
523 differences in apoptosis between the mouse groups. Using Annexin-V- /Propidium iodide (PI)  
524 staining and flow cytometry we found that the percentage of apoptotic PMNs increased following  
525 infection (Fig S4A-C); however, there were no differences among the mouse groups. This was  
526 further confirmed using a lactate dehydrogenase (LDH) release assay (Fig S4D).

527 To determine whether JNK/AP-1 signaling played a role in PMN antibacterial function,  
528 we treated PMNs from young WT mice with the JNK stimulator Anisomycin and measured their  
529 ability to kill bacteria using our opsonophagocytic killing assay. The ability of Anisomycin to  
530 activate the JNK pathway was confirmed by measuring the extent of c-Jun phosphorylation by  
531 flow cytometry (Fig. 10B). Interestingly, we found a significant 2-fold reduction in the ability of  
532 PMNs from young mice to kill *S. pneumoniae* upon treatment with Anisomycin (Fig. 11A). As  
533 activation of JNK signaling blunted PMN antimicrobial function, we then asked whether the  
534 function of PMNs from old WT and CD73KO mice can be rescued by inhibiting this pathway. To  
535 do this, PMNs from old WT or CD73KO mice were treated with JNK-IN-8 or SR11302 prior to  
536 infection. JNK-IN-8 is a selective and high affinity inhibitor that irreversibly blocks the catalytic  
537 domain of JNK (41) while SR11302 is a selective inhibitor of AP-1 complex (42). The ability of  
538 JNK-IN-8 to inhibit phosphorylation of c-Jun was also confirmed by flow cytometry (Fig. 10B).  
539 We found that strikingly, treatment of PMNs with SR11302 or JNK-IN-8 significantly enhanced  
540 their ability to kill *S. pneumoniae* by 5- and 10-fold respectively, in both old and CD73KO mice



541 (Fig 11 B and C). None of the JNK pathway inhibitors or activators had any significant effect on  
542 bacterial viability directly (Fig S5). These data indicate that blocking the JNK/AP-1 pathway  
543 reverses the defect in pneumococcal killing by PMNs from old WT and CD73KO mice.

544

545

546

547

548

549

550

551

552

553

554

555

556

557

558

559

560

561

562

563

564 **Discussion**

565 PMN antimicrobial function declines with aging and is in part driven by changes in  
566 extracellular adenosine production and signaling (10). The aim of this study was to examine  
567 transcriptional changes in PMNs in response to *S. pneumoniae* infection across different hosts to  
568 better understand how aging impairs PMN function and what aspect of this was controlled by the  
569 extracellular adenosine-producing enzyme CD73. We found very limited differences in mRNA  
570 expression in mock-stimulated PMNs across the different hosts, indicating that either the intrinsic  
571 age-related defect in PMN function occurs at the protein level, or it is the transcriptional response  
572 following external stimulation which drives the difference in PMN responses, or both. In fact, *S.*  
573 *pneumoniae* infection triggered global transcriptional changes that were distinct across the  
574 different hosts.

575 A surprising finding was that there were 2-3-fold more down-regulated than up-regulated  
576 genes in response to infection across all host groups. Sixty percent of the up-regulated genes in  
577 WT mice were the same regardless of host age while the majority of the down-regulated DEGs  
578 were shared across the three different hosts suggesting an overall blunting of transcriptional  
579 activity and expression of only select transcripts in activated PMNs. This is reminiscent of stress  
580 responses observed in yeast cells where only genes required for resistance against a particular  
581 stressor are expressed while the rest are shut off, possibly to conserve energy (43-46). Overall,  
582 the number of DEGs in response to infection was not high (ranged from 45-103 genes across the  
583 different hosts), which is consistent with the lower amount of mRNA and overall transcriptional  
584 activity observed in PMNs as compared to other immune cells (47, 48). However, even these  
585 relatively moderate changes were key for efficient antimicrobial function as inhibition of  
586 transcription significantly impaired the ability of PMNs to kill pneumococci. It is possible that

587 larger changes in gene expression would be observed with time as indicated by up-regulation of  
588 genes involved in transcription activation or transcription regulation across all hosts. Here, we  
589 limited our study to observing changes within forty minutes of infection due to concerns about the  
590 effects of bacterial infection on PMN viability in culture (49). In summary, this study shows that  
591 PMNs undergo transcriptional reprogramming which is required for their ability to efficiently kill  
592 bacteria.

593 CD73KO neutrophils displayed the strongest transcriptional response to *S. pneumoniae*,  
594 with 40% more differentially expressed genes during infection as compared to WT age-matched  
595 controls. This correlated with significant changes in expression of more than 20 lncRNAs in  
596 response to infection, 77% of which were up-regulated. In contrast, PMNs from young WT  
597 controls displayed only 5 differentially expressed lncRNAs, all of which were down-regulated,  
598 while PMNs from old mice had none. These findings suggest that during *S. pneumoniae* infection,  
599 lncRNA expression in PMNs is negatively controlled by CD73 or extracellular adenosine  
600 production. Extracellular adenosine was previously shown to activate expression of MEG3, a  
601 lncRNA in a liver cancer cell line (50). This study, to our knowledge, is the first to report a link  
602 between the EAD pathway and lncRNA expression in PMNs in response to infection. Furthermore,  
603 our data suggest that in the absence of CD73, changes in lncRNA expression dysregulates several  
604 biological processes in the cell, including those important for PMN antimicrobial activity. Recent  
605 studies have highlighted the role of lncRNAs in transcriptional regulation of inflammatory  
606 responses of several immune cells (51), including macrophages (52, 53) and human PMNs (54,  
607 55). Interestingly, polymorphisms in lncRNAs expressed in neutrophils was associated with  
608 pneumococcal bacteremia in children in Kenya (56).

609 Of particular interest in our study, were genes that were up- and down-regulated only in  
610 PMNs from WT old and CD73KO mice but not in the young controls. Among genes that were  
611 down-regulated were *Rrad* and *CD40*, that have a role in oxidative responses. Binding of CD40 to  
612 its ligand activates downstream PI3K/NF- $\kappa$ B leading to PMN oxidative burst (57) and defect in  
613 CD40 signaling is associated with blunted respiratory burst and antimicrobial activity in human  
614 PMNs (57). We previously found that CD73KO PMNs were defective in reactive oxygen species  
615 (ROS) production upon pneumococcal challenge (12). While PMNs from old mice do not show a  
616 defect in ROS production (10), aging is often associated with a buildup of reactive oxygen species,  
617 which if not controlled, can lead to cellular damage (58). *Rrad* (Ras-related associated with  
618 diabetes) is a GTP binding and calmodulin binding protein involved in reducing oxidative stress  
619 and preventing cellular senescence (59). Thus, reduction in *Rrad* expression could indicate an age-  
620 related decline in the ability of PMNs to counteract the oxidative stress induced following *S.*  
621 *pneumoniae* challenge. Among the genes up-regulated only upon infection in PMNs from old WT  
622 and CD73KO mice were *Slfn1* and *Nr4a1*. *Slfn-1* is known for its role as inducer of cell cycle  
623 arrest in immune cells (60). *Nr4a1* on the other hand belongs to family of nuclear receptor proteins  
624 that are rapidly induced under stress conditions and play an important role in DNA repair.  
625 Members of this family show aberrant expression in inflamed tissues and have emerged as key  
626 regulators of various diseases affecting the aging population (61). Interestingly, DNA damage and  
627 cell cycle arrest are characteristic features of cellular senescence (58). Overall, shared changes in  
628 gene expression in PMNs from old WT and CD73KO mice in response to infection, suggest an  
629 overall decline in the ability of these cells to aptly adapt to the infection-mediated stress, which in  
630 part is regulated by CD73.

631 KEGG pathway analysis showed that *S. pneumoniae* up-regulated MAPK-pathways in  
632 PMNs from both CD73KO and old mice but not in PMNs from young host. MAPK-pathways  
633 include JNK, p38, and ERK1/2, all of which regulate various cellular processes in response to  
634 external stimuli (62). Importantly, certain aspects of PMN function are attributed to different  
635 MAPK pathways. These include p38 MAPK and ERK mediated chemotaxis and respiratory burst  
636 (63, 64), MEK/ERK-mediated oxidative burst and phagocytosis (65) and p38 MAPK-mediated  
637 degranulation (66). Here, we observed upregulation of *Fos* and *Jun*, the components of activator  
638 protein-1 (AP-1) transcription complex which is regulated downstream of JNK signaling (37). We  
639 found that upon infection, c-Jun is phosphorylated in all mouse groups; however, the proportion  
640 of c-Jun undergoing phosphorylation was significantly higher in PMNs from old WT and CD73KO  
641 mice in comparison to young controls, indicating an increase in MAPK activation in these PMNs.  
642 Interestingly, host aging has been reported to be associated with an increase in basal levels of  
643 activation of other mitogen-activated protein kinase (MAPK) pathways including ERK1/2 and  
644 p38MAPK in PMNs (67-70). Importantly, these changes impair the ability of PMNs to respond to  
645 acute stimuli and impair their function (67, 71). For example, elevated activation of ERK1/2  
646 impairs the ability of inflammatory signals to delay apoptosis in PMNs from elderly donors (68,  
647 72). In fact, pharmacologically targeting these pathways has been shown to improve PMN function  
648 in elderly hosts. In sterile injury of the skin, oral administration of a p38 MAPK inhibitor resulted  
649 in enhanced PMN clearance in elderly donors (73). Similarly, here we found that stimulation of  
650 JNK/AP-1 blunted PMN anti-pneumococcal responses in young hosts while inhibition of this  
651 pathway rescued the ability of PMNs from old and CD73KO mice to kill *S. pneumoniae*, indicating  
652 that over-activation of JNK/AP-1 impairs PMN antimicrobial function. The role of JNK/AP-1

653 may be pathogen specific as inhibition of the JNK pathway decreased ROS production and release  
654 of NETs by PMNs in response to the Gram-negative bacteria *E. coli* and *P. aeruginosa* (74).

655 In conclusion, this study demonstrated the ability of PMNs to modify their gene expression  
656 to better adapt to bacterial infection and found that this capacity declines with age and is in part  
657 regulated by CD73. Importantly, we identified JNK/AP-1 signaling as a potential target for  
658 therapeutic intervention that can boost resistance of vulnerable hosts against *S. pneumoniae*  
659 infection.

660

661

662

663

664

665

666

667

668

669

670

671

672

673

674

675

676 **Acknowledgements**

677 RNA sequencing was performed at Genomics and Bioinformatics Core facility at University at  
678 Buffalo. We thank Donald Yergeau for helpful discussions. We also thank Sujith A.  
679 Valiyaparambil for technical and logistical assistance.

680

681

682

683

684

685

686

687

688

689

690

691

692

693

694

695

696

697

698

699

700 **References**

- 701 1. Troeger, C., B. Blacker, I. A. Khalil, P. C. Rao, J. Cao, S. R. M. Zimsen, S. B. Albertson,  
702 A. Deshpande, T. Farag, Z. Abebe, I. M. O. Adetifa, T. B. Adhikari, M. Akibu, F. H. Al  
703 Lami, A. Al-Eyadhy, N. Alvis-Guzman, A. T. Amare, Y. A. Amoako, C. A. T. Antonio,  
704 O. Aremu, E. T. Asfaw, S. W. Asgedom, T. M. Atey, E. F. Attia, E. F. G. A. Avokpaho,  
705 H. T. Ayele, T. B. Ayuk, K. Balakrishnan, A. Barac, Q. Bassat, M. Behzadifar, M.  
706 Behzadifar, S. Bhaumik, Z. A. Bhutta, A. Bijani, M. Brauer, A. Brown, P. A. M. Camargos,  
707 C. A. Castañeda-Orjuela, D. Colombara, S. Conti, A. F. Dadi, L. Dandona, R. Dandona,  
708 H. P. Do, E. Dubljanin, D. Edessa, H. Elkout, A. Y. Endries, D. O. Fijabi, K. J. Foreman,  
709 M. H. Forouzanfar, N. Fullman, A. L. Garcia-Basteiro, B. D. Gessner, P. W. Gething, R.  
710 Gupta, T. Gupta, G. B. Hailu, H. Y. Hassen, M. T. Hedayati, M. Heidari, D. T. Hibstu, N.  
711 Horita, O. S. Ilesanmi, M. B. Jakovljevic, A. A. Jamal, A. Kahsay, A. Kasaeian, D. H.  
712 Kassa, Y. S. Khader, E. A. Khan, M. N. Khan, Y.-H. Khang, Y. J. Kim, N. Kisson, L. D.  
713 Knibbs, S. Kochhar, P. A. Koul, G. A. Kumar, R. Lodha, H. Magdy Abd El Razek, D. C.  
714 Malta, J. L. Mathew, D. T. Mengistu, H. B. Mezgebe, K. A. Mohammad, M. A.  
715 Mohammed, F. Momeniha, S. Murthy, C. T. Nguyen, K. R. Nielsen, D. N. A. Ningrum, Y.  
716 L. Nirayo, E. Oren, J. R. Ortiz, M. Pa, M. J. Postma, M. Qorbani, R. Quansah, R. K. Rai,  
717 S. M. Rana, C. L. Ranabhat, S. E. Ray, M. S. Rezai, G. M. Ruhago, S. Safiri, J. A. Salomon,  
718 B. Sartorius, M. Savic, M. Sawhney, J. She, A. Sheikh, M. S. Shiferaw, M. Shigematsu, J.  
719 A. Singh, R. Somayaji, J. D. Stanaway, M. B. Sufiyan, G. R. Taffere, M.-H. Temsah, M.  
720 J. Thompson, R. Tobe-Gai, R. Topor-Madry, B. X. Tran, T. T. Tran, K. B. Tuem, K. N.  
721 Ukwaja, S. E. Vollset, J. L. Walson, F. Weldegebreel, A. Werdecker, T. E. West, N.



- 722 Yonemoto, M. E. S. Zaki, L. Zhou, S. Zodpey, T. Vos, M. Naghavi, S. S. Lim, A. H.  
723 Mokdad, C. J. L. Murray, S. I. Hay, and R. C. Reiner. 2018. Estimates of the global,  
724 regional, and national morbidity, mortality, and aetiologies of lower respiratory infections  
725 in 195 countries, 1990–2016: a systematic analysis for the Global Burden of Disease Study  
726 2016. *The Lancet Infectious Diseases* 18: 1191-1210.
- 727 2. Wunderink, R. G., and G. Waterer. 2017. Advances in the causes and management of  
728 community acquired pneumonia in adults. *BMJ* 358: j2471.
- 729 3. CDC. 2018. Active Bacterial Core Surveillance Report, Emerging Infections Program  
730 Network, *Streptococcus pneumoniae*.
- 731 4. Boe, D. M., L. A. Boule, and E. J. Kovacs. 2017. Innate immune responses in the ageing  
732 lung. *Clin Exp Immunol* 187: 16-25.
- 733 5. Garvy, B. A., and A. G. Harmsen. 1996. The importance of neutrophils in resistance to  
734 pneumococcal pneumonia in adult and neonatal mice. *Inflammation* 20: 499-512.
- 735 6. Hahn, I., A. Klaus, A. K. Janze, K. Steinwede, N. Ding, J. Bohling, C. Brumshagen, H.  
736 Serrano, F. Gauthier, J. C. Paton, T. Welte, and U. A. Maus. 2011. Cathepsin G and  
737 neutrophil elastase play critical and nonredundant roles in lung-protective immunity  
738 against *Streptococcus pneumoniae* in mice. *Infect Immun* 79: 4893-4901.
- 739 7. Bou Ghanem, E. N., S. Clark, S. E. Roggensack, S. R. McIver, P. Alcaide, P. G. Haydon,  
740 and J. M. Leong. 2015. Extracellular Adenosine Protects against *Streptococcus*  
741 *pneumoniae* Lung Infection by Regulating Pulmonary Neutrophil Recruitment. *PLoS*  
742 *Pathog* 11: e1005126.

- 743 8. Simmons, S. R., M. Bhalla, S. E. Herring, E. Y. I. Tchalla, and E. N. Bou Ghanem. 2021.  
744 Older but not wiser: The age-driven changes in neutrophil responses during pulmonary  
745 infections. *Infection and Immunity*: IAI.00653-00620.
- 746 9. Simell, B., A. Vuorela, N. Ekstrom, A. Palmu, A. Reunanen, S. Meri, H. Kayhty, and M.  
747 Vakevainen. 2011. Aging reduces the functionality of anti-pneumococcal antibodies and  
748 the killing of *Streptococcus pneumoniae* by neutrophil phagocytosis. *Vaccine* 29: 1929-  
749 1934.
- 750 10. Bhalla, M., S. R. Simmons, A. Abamonte, S. E. Herring, S. E. Roggensack, and E. N. Bou  
751 Ghanem. 2020. Extracellular adenosine signaling reverses the age-driven decline in the  
752 ability of neutrophils to kill *Streptococcus pneumoniae*. *Aging cell* 19: e13218-e13218.
- 753 11. Thompson, L. F., et al. 2004. Crucial Role for Ecto-5'-Nucleotidase (CD73) in Vascular  
754 Leakage during Hypoxia. *Journal of Experimental Medicine* 200: 1395-1405.
- 755 12. Siwapornchai, N., J. N. Lee, E. Y. I. Tchalla, M. Bhalla, J. H. Yeoh, S. E. Roggensack, J.  
756 M. Leong, and E. N. Bou Ghanem. 2020. Extracellular adenosine enhances the ability of  
757 PMNs to kill *Streptococcus pneumoniae* by inhibiting IL-10 production. *J Leukoc Biol.*
- 758 13. Subrahmanyam, Y. V. B. K., S. Yamaga, Y. Prashar, H. H. Lee, N. P. Hoe, Y. Kluger, M.  
759 Gerstein, J. D. Goguen, P. E. Newburger, and S. M. Weissman. 2001. RNA expression  
760 patterns change dramatically in human neutrophils exposed to bacteria. *Blood* 97: 2457-  
761 2468.
- 762 14. Gomez, J. C., H. Dang, M. Kanke, R. S. Hagan, J. R. Mock, S. N. P. Kelada, P. Sethupathy,  
763 and C. M. Doerschuk. 2017. Predicted effects of observed changes in the mRNA and  
764 microRNA transcriptome of lung neutrophils during *S. pneumoniae* pneumonia in mice.  
765 *Sci Rep* 7: 11258.

- 766 15. Thompson, L. F., H. K. Eltzschig, J. C. Ibla, C. J. Van De Wiele, R. Resta, J. C. Morote-  
767 Garcia, and S. P. Colgan. 2004. Crucial role for ecto-5'-nucleotidase (CD73) in vascular  
768 leakage during hypoxia. *J Exp Med* 200: 1395-1405.
- 769 16. Greene, N. G., A. R. Narciso, S. R. Filipe, and A. Camilli. 2015. Peptidoglycan Branched  
770 Stem Peptides Contribute to *Streptococcus pneumoniae* Virulence by Inhibiting  
771 Pneumolysin Release. *PLoS Pathog* 11: e1004996.
- 772 17. Swamydas, M., and M. S. Lionakis. 2013. Isolation, purification and labeling of mouse  
773 bone marrow neutrophils for functional studies and adoptive transfer experiments. *J Vis  
774 Exp*: e50586.
- 775 18. Ewels, P., M. Magnusson, S. Lundin, and M. Källér. 2016. MultiQC: summarize analysis  
776 results for multiple tools and samples in a single report. *Bioinformatics* 32: 3047-3048.
- 777 19. Kim, D., B. Langmead, and S. L. Salzberg. 2015. HISAT: a fast spliced aligner with low  
778 memory requirements. *Nature Methods* 12: 357-360.
- 779 20. Liao, Y., G. K. Smyth, and W. Shi. 2013. featureCounts: an efficient general purpose  
780 program for assigning sequence reads to genomic features. *Bioinformatics* 30: 923-930.
- 781 21. Love, M. I., W. Huber, and S. Anders. 2014. Moderated estimation of fold change and  
782 dispersion for RNA-seq data with DESeq2. *Genome Biology* 15: 550.
- 783 22. Huang, D. W., B. T. Sherman, and R. A. Lempicki. 2008. Bioinformatics enrichment tools:  
784 paths toward the comprehensive functional analysis of large gene lists. *Nucleic Acids  
785 Research* 37: 1-13.
- 786 23. Li J, M. W., Zeng P, Wang J, Geng B, Yang J, and Cui Q. 2015. LncTar: a tool for  
787 predicting the RNA targets of long noncoding RNAs. *Briefings in Bioinformatics* 16.

- 788 24. Paraskevopoulou, M. D., I. S. Vlachos, D. Karagkouni, G. Georgakilas, I. Kanellos, T.  
789 Vergoulis, K. Zagganas, P. Tsanakas, E. Floros, T. Dalamagas, and A. G. Hatzigeorgiou.  
790 2015. DIANA-LncBase v2: indexing microRNA targets on non-coding transcripts. *Nucleic*  
791 *Acids Research* 44: D231-D238.
- 792 25. Morenikeji OB, H. M., Hudson AO and Thomas BN. 2019. Computational network  
793 analysis identifies evolutionarily conserved miRNA gene interactions potentially  
794 regulating immune response in bovine trypanosomosis. *Front. Microbiol.* 10: 2010.
- 795 26. Buza, T., M. Arick, H. Wang, and D. G. Peterson. 2014. Computational prediction of  
796 disease microRNAs in domestic animals. *BMC Research Notes* 7: 403.
- 797 27. Livak, K. J., and T. D. Schmittgen. 2001. Analysis of relative gene expression data using  
798 real-time quantitative PCR and the 2<sup>(-Delta Delta C(T))</sup> Method. *Methods* 25: 402-408.
- 799 28. Standish, A. J., and J. N. Weiser. 2009. Human neutrophils kill *Streptococcus pneumoniae*  
800 via serine proteases. *J Immunol* 183: 2602-2609.
- 801 29. Suman, S., G. Rachakonda, S. N. Mandape, S. S. Sakhare, F. Villalta, S. Pratap, M. F.  
802 Lima, and P. N. Nde. 2018. Phospho-proteomic analysis of primary human colon epithelial  
803 cells during the early *Trypanosoma cruzi* infection phase. *PLoS Negl Trop Dis* 12:  
804 e0006792-e0006792.
- 805 30. Sheshachalam, A., N. Srivastava, T. Mitchell, P. Lacy, and G. Eitzen. 2014. Granule  
806 Protein Processing and Regulated Secretion in Neutrophils. *Frontiers in Immunology* 5.
- 807 31. Lysenko, E. S., T. B. Clarke, M. Shchepetov, A. J. Ratner, D. I. Roper, C. G. Dowson, and  
808 J. N. Weiser. 2007. Nod1 signaling overcomes resistance of *S. pneumoniae* to  
809 opsonophagocytic killing. *PLoS Pathog* 3: e118.

- 810 32. Chang, F. Y., & Shaio, M. F. . 1990. In vitro effect of actinomycin D on human neutrophil  
811 function. *Microbiology and immunology* 34: 311-321.
- 812 33. Hsu, H. Y., Nicholson, A. C., & Hajjar, D. P. . 1996. Inhibition of macrophage scavenger  
813 receptor activity by tumor necrosis factor-alpha is transcriptionally and post-  
814 transcriptionally regulated. . *The Journal of biological chemistry* 271: 7767-7773.
- 815 34. Hsieh, V., M.-J. Kim, I. C. Gelissen, A. J. Brown, C. Sandoval, J. C. Hallab, M. Kockx,  
816 M. Traini, W. Jessup, and L. Kritharides. 2014. Cellular cholesterol regulates  
817 ubiquitination and degradation of the cholesterol export proteins ABCA1 and ABCG1. *J*  
818 *Biol Chem* 289: 7524-7536.
- 819 35. Dalia, A. B., A. J. Standish, and J. N. Weiser. 2010. Three surface exoglycosidases from  
820 *Streptococcus pneumoniae*, NanA, BgaA, and StrH, promote resistance to  
821 opsonophagocytic killing by human neutrophils. *Infect Immun* 78: 2108-2116.
- 822 36. Gomez, J. C., H. Dang, J. R. Martin, and C. M. Doerschuk. 2016. Nrf2 Modulates Host  
823 Defense during *Streptococcus pneumoniae* Pneumonia in Mice. *The Journal*  
824 *of Immunology* 197: 2864-2879.
- 825 37. Zeke, A., M. Misheva, A. Reményi, and M. A. Bogoyevitch. 2016. JNK Signaling:  
826 Regulation and Functions Based on Complex Protein-Protein Partnerships. *Microbiology*  
827 *and Molecular Biology Reviews* 80: 793-835.
- 828 38. Brandt, B., Abou-Eladab, E. F., Tiedge, M., & Walzel, H. . 2010. Role of the JNK/c-  
829 Jun/AP-1 signaling pathway in galectin-1-induced T-cell death. *Cell death & disease* 1:  
830 e23.
- 831 39. Kolomeichuk, S. N., Terrano, D. T., Lyle, C. S., Sabapathy, K., & Chambers, T. C. . 2008.  
832 Distinct signaling pathways of microtubule inhibitors--vinblastine and Taxol induce JNK-

- 833 dependent cell death but through AP-1-dependent and AP-1-independent mechanisms,  
834 respectively. . *The FEBS journal* 275: 1889-1899.
- 835 40. Dhanasekaran, D. N., & Reddy, E. P. . 2008. JNK signaling in apoptosis. *Oncogene* 27:  
836 6245–6251.
- 837 41. Zhang, T., F. Inesta-Vaquera, M. Niepel, J. Zhang, S. B. Ficarro, T. Machleidt, T. Xie, J.  
838 A. Marto, N. Kim, T. Sim, J. D. Laughlin, H. Park, P. V. LoGrasso, M. Patricelli, T. K.  
839 Nomanbhoy, P. K. Sorger, D. R. Alessi, and N. S. Gray. 2012. Discovery of potent and  
840 selective covalent inhibitors of JNK. *Chem Biol* 19: 140-154.
- 841 42. Fanjul, A., M. I. Dawson, P. D. Hobbs, L. Jong, J. F. Cameron, E. Harlev, G. Graupner, X.  
842 P. Lu, and M. Pfahl. 1994. A new class of retinoids with selective inhibition of AP-1  
843 inhibits proliferation. *Nature* 372: 107-111.
- 844 43. Leipheimer, J., A. L. M. Bloom, C. S. Campomizzi, Y. Salei, and J. C. Panepinto. 2019.  
845 Translational Regulation Promotes Oxidative Stress Resistance in the Human Fungal  
846 Pathogen *Cryptococcus neoformans*. *mBio* 10.
- 847 44. Bloom, A. L. M., R. M. Jin, J. Leipheimer, J. E. Bard, D. Yergeau, E. A. Wohlfert, and J.  
848 C. Panepinto. 2019. Thermotolerance in the pathogen *Cryptococcus neoformans* is linked  
849 to antigen masking via mRNA decay-dependent reprogramming. *Nat Commun* 10: 4950.
- 850 45. López-Maury, L., S. Marguerat, and J. Bähler. 2008. Tuning gene expression to changing  
851 environments: from rapid responses to evolutionary adaptation. *Nature Reviews Genetics*  
852 9: 583-593.
- 853 46. Murray, J. I., M. L. Whitfield, N. D. Trinklein, R. M. Myers, P. O. Brown, and D. Botstein.  
854 2004. Diverse and specific gene expression responses to stresses in cultured human cells.  
855 *Mol Biol Cell* 15: 2361-2374.

- 856 47. Monaco, G., B. Lee, W. Xu, S. Mustafah, Y. Y. Hwang, C. Carré, N. Burdin, L. Visan, M.  
857 Ceccarelli, M. Poidinger, A. Zippelius, J. Pedro de Magalhães, and A. Larbi. 2019. RNA-  
858 Seq Signatures Normalized by mRNA Abundance Allow Absolute Deconvolution of  
859 Human Immune Cell Types. *Cell Rep* 26: 1627-1640.e1627.
- 860 48. Vafadarnejad, E., G. Rizzo, L. Krampert, P. Arampatzi, A.-P. Arias-Loza, Y. Nazzal, A.  
861 Rizakou, T. Knochenhauer, S. R. Bandi, V. A. Nugroho, D. J. J. Schulz, M. Roesch, P.  
862 Alayrac, J. Vilar, J.-S. Silvestre, A. Zerneck, A.-E. Saliba, and C. Cochain. 2020.  
863 Dynamics of Cardiac Neutrophil Diversity in Murine Myocardial Infarction. *Circulation*  
864 *Research* 127: e232-e249.
- 865 49. Zysk, G., L. Bejo, B. K. Schneider-Wald, R. Nau, and H. Heinz. 2000. Induction of necrosis  
866 and apoptosis of neutrophil granulocytes by *Streptococcus pneumoniae*. *Clin Exp Immunol*  
867 122: 61-66.
- 868 50. Liu, L.-X., W. Deng, X.-T. Zhou, R.-P. Chen, M.-Q. Xiang, Y.-T. Guo, Z.-J. Pu, R. Li, G.-  
869 F. Wang, and L.-F. Wu. 2016. The mechanism of adenosine-mediated activation of  
870 lncRNA MEG3 and its antitumor effects in human hepatoma cells. *Int J Oncol* 48: 421-  
871 429.
- 872 51. Chen, J., L. Ao, and J. Yang. 2019. Long non-coding RNAs in diseases related to  
873 inflammation and immunity. *Ann Transl Med* 7: 494-494.
- 874 52. Carpenter, S., D. Aiello, M. K. Atianand, E. P. Ricci, P. Gandhi, L. L. Hall, M. Byron, B.  
875 Monks, M. Henry-Bezy, J. B. Lawrence, L. A. J. O'Neill, M. J. Moore, D. R. Caffrey, and  
876 K. A. Fitzgerald. 2013. A long noncoding RNA mediates both activation and repression of  
877 immune response genes. *Science* 341: 789-792.

- 878 53. Atianand, M. K., W. Hu, A. T. Satpathy, Y. Shen, E. P. Ricci, J. R. Alvarez-Dominguez,  
879 A. Bhatta, S. A. Schattgen, J. D. McGowan, J. Blin, J. E. Braun, P. Gandhi, M. J. Moore,  
880 H. Y. Chang, H. F. Lodish, D. R. Caffrey, and K. A. Fitzgerald. 2016. A Long Noncoding  
881 RNA lincRNA-EPS Acts as a Transcriptional Brake to Restrain Inflammation. *Cell* 165:  
882 1672-1685.
- 883 54. Jiang, N., X. Zhang, Y. He, B. Luo, C. He, Y. Liang, J. Zeng, W. Li, Y. Xian, and X.  
884 Zheng. 2019. Identification of key protein-coding genes and lncRNAs in spontaneous  
885 neutrophil apoptosis. *Scientific Reports* 9: 15106.
- 886 55. Jiang, K., X. Sun, Y. Chen, Y. Shen, and J. N. Jarvis. 2015. RNA sequencing from human  
887 neutrophils reveals distinct transcriptional differences associated with chronic  
888 inflammatory states. *BMC Med Genomics* 8: 55.
- 889 56. A. Rautanen, M. Pirinen, T. C. Mills, K. A. Rockett, A. Strange, A. W. Ndungu, V.  
890 Naranbhai, J. J. Gilchrist, C. Bellenguez, C. Freeman, G. Band, S. J. Bumpstead, S. Edkins,  
891 E. Giannoulatou, E. Gray, S. Dronov, S. E. Hunt, C. Langford, R. D. Pearson, Z. Su, D.  
892 Vukcevic, A. W. Macharia, S. Uyoga, C. Ndila, N. Mturi, P. Njuguna, S. Mohammed, J.  
893 A. Berkley, I. Mwangi, S. Mwarumba, B. S. Kitsao, B. S. Lowe, S. C. Morpeth, I.  
894 Khandwalla, G. Kilifi Bacteraemia Surveillance, J. M. Blackwell, E. Bramon, M. A.  
895 Brown, J. P. Casas, A. Corvin, A. Duncanson, J. Jankowski, H. S. Markus, C. G. Mathew,  
896 C. N. A. Palmer, R. Plomin, S. J. Sawcer, R. C. Trembath, A. C. Viswanathan, N. W.  
897 Wood, P. Deloukas, L. Peltonen, T. N. Williams, J. A. G. Scott, S. J. Chapman, P.  
898 Donnelly, A. V. S. Hill, and C. C. A. Spencer. 2016. Polymorphism in a lincRNA  
899 Associates with a Doubled Risk of Pneumococcal Bacteremia in Kenyan Children.  
900 *American journal of human genetics* 98: 1092-1100.



- 901 57. Jin, R., S. Yu, Z. Song, X. Zhu, C. Wang, J. Yan, F. Wu, A. Nanda, D. N. Granger, and G.  
902 Li. 2013. Soluble CD40 Ligand Stimulates CD40-Dependent Activation of the  $\beta$ 2 Integrin  
903 Mac-1 and Protein Kinase C Zeta (PKC $\zeta$ ) in Neutrophils: Implications for Neutrophil-  
904 Platelet Interactions and Neutrophil Oxidative Burst. *PLOS ONE* 8: e64631.
- 905 58. López-Otín, C., M. A. Blasco, L. Partridge, M. Serrano, and G. Kroemer. 2013. The  
906 hallmarks of aging. *Cell* 153: 1194-1217.
- 907 59. Wei, Z., H. Guo, J. Qin, S. Lu, Q. Liu, X. Zhang, Y. Zou, Y. Gong, and C. Shao. 2019.  
908 Pan-senescence transcriptome analysis identified RRAD as a marker and negative  
909 regulator of cellular senescence. *Free Radic Biol Med* 130: 267-277.
- 910 60. Jang, S., S. M. Ryu, J. Lee, H. Lee, S. H. Hong, K. S. Ha, W. S. Park, E. T. Han, and S. R.  
911 Yang. 2019. Bleomycin Inhibits Proliferation via Schlafen-Mediated Cell Cycle Arrest in  
912 Mouse Alveolar Epithelial Cells. *Tuberc Respir Dis (Seoul)* 82: 133-142.
- 913 61. Jeanneteau, F., C. Barrère, M. Vos, C. J. M. De Vries, C. Rouillard, D. Levesque, Y.  
914 Dromard, M. P. Moisan, V. Duric, T. C. Franklin, R. S. Duman, D. A. Lewis, S. D.  
915 Ginsberg, and M. Arango-Lievano. 2018. The Stress-Induced Transcription Factor NR4A1  
916 Adjusts Mitochondrial Function and Synapse Number in Prefrontal Cortex. *J Neurosci* 38:  
917 1335-1350.
- 918 62. Yang, Y., S. C. Kim, T. Yu, Y.-S. Yi, M. H. Rhee, G.-H. Sung, B. C. Yoo, and J. Y. Cho.  
919 2014. Functional roles of p38 mitogen-activated protein kinase in macrophage-mediated  
920 inflammatory responses. *Mediators Inflamm* 2014: 352371-352371.
- 921 63. Benna, J. E., J. Han, J.-W. Park, E. Schmid, R. J. Ulevitch, and B. M. Babior. 1996.  
922 Activation of p38 in Stimulated Human Neutrophils: Phosphorylation of the Oxidase

- 923 Component p47phox by p38 and ERK but Not by JNK. *Archives of Biochemistry and*  
924 *Biophysics* 334: 395-400.
- 925 64. Suzuki, K., M. Hino, H. Kutsuna, F. Hato, C. Sakamoto, T. Takahashi, N. Tatsumi, and S.  
926 Kitagawa. 2001. Selective Activation of p38 Mitogen-Activated Protein Kinase Cascade  
927 in Human Neutrophils Stimulated by IL-1 $\beta$ . *The Journal of Immunology* 167: 5940-5947.
- 928 65. Downey, G. P., J. R. Butler, H. Tapper, L. Fialkow, A. R. Saltiel, B. B. Rubin, and S.  
929 Grinstein. 1998. Importance of MEK in Neutrophil Microbicidal Responsiveness. *The*  
930 *Journal of Immunology* 160: 434-443.
- 931 66. Mócsai, A., Z. Jakus, T. Vántus, G. Berton, C. A. Lowell, and E. Ligeti. 2000. Kinase  
932 Pathways in Chemoattractant-Induced Degranulation of Neutrophils: The Role of p38  
933 Mitogen-Activated Protein Kinase Activated by Src Family Kinases. *The Journal of*  
934 *Immunology* 164: 4321-4331.
- 935 67. Fulop, T., A. Larbi, N. Douziech, C. Fortin, K. P. Guerard, O. Lesur, A. Khalil, and G.  
936 Dupuis. 2004. Signal transduction and functional changes in neutrophils with aging. *Aging*  
937 *Cell* 3: 217-226.
- 938 68. Fortin, C. F., A. Larbi, G. Dupuis, O. Lesur, and T. Fulop, Jr. 2007. GM-CSF activates the  
939 Jak/STAT pathway to rescue polymorphonuclear neutrophils from spontaneous apoptosis  
940 in young but not elderly individuals. *Biogerontology* 8: 173-187.
- 941 69. Fortin, C. F., A. Larbi, O. Lesur, N. Douziech, and T. Fulop, Jr. 2006. Impairment of SHP-  
942 1 down-regulation in the lipid rafts of human neutrophils under GM-CSF stimulation  
943 contributes to their age-related, altered functions. *J Leukoc Biol* 79: 1061-1072.

- 944 70. Larbi, A., N. Douziech, C. Fortin, A. Linteau, G. Dupuis, and T. Fulop, Jr. 2005. The role  
945 of the MAPK pathway alterations in GM-CSF modulated human neutrophil apoptosis with  
946 aging. *Immun Ageing* 2: 6.
- 947 71. Sapey, E., H. Greenwood, G. Walton, E. Mann, A. Love, N. Aaronson, R. H. Insall, R. A.  
948 Stockley, and J. M. Lord. 2014. Phosphoinositide 3-kinase inhibition restores neutrophil  
949 accuracy in the elderly: toward targeted treatments for immunosenescence. *Blood* 123:  
950 239-248.
- 951 72. Tortorella, C., O. Simone, G. Piazzolla, I. Stella, V. Cappiello, and S. Antonaci. 2006. Role  
952 of phosphoinositide 3-kinase and extracellular signal-regulated kinase pathways in  
953 granulocyte macrophage-colony-stimulating factor failure to delay fas-induced neutrophil  
954 apoptosis in elderly humans. *J Gerontol A Biol Sci Med Sci* 61: 1111-1118.
- 955 73. De Maeyer, R. P. H., R. C. van de Merwe, R. Louie, O. V. Bracken, O. P. Devine, D. R.  
956 Goldstein, M. Uddin, A. N. Akbar, and D. W. Gilroy. 2020. Blocking elevated p38 MAPK  
957 restores efferocytosis and inflammatory resolution in the elderly. *Nat Immunol* 21: 615-  
958 625.
- 959 74. Khan, M. A., A. Farahvash, D. N. Douda, J.-C. Licht, H. Grasemann, N. Swezey, and N.  
960 Palaniyar. 2017. JNK Activation Turns on LPS- and Gram-Negative Bacteria-Induced  
961 NADPH Oxidase-Dependent Suicidal NETosis. *Scientific Reports* 7: 3409.

962

963

964

965

966

967 **Figures and Legends**

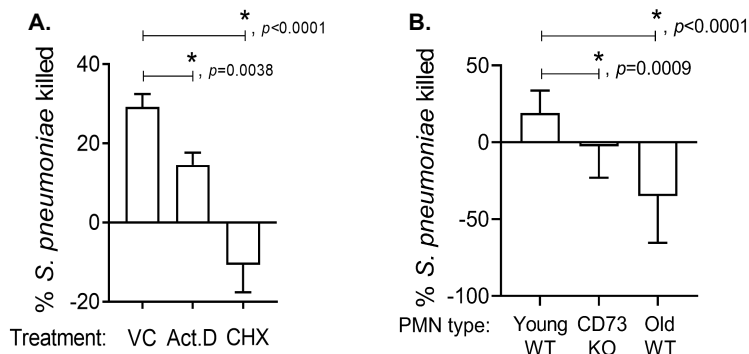

968

969 **Figure 1. Active transcription and translation are required for the ability of PMNs to kill *S.***

970 ***pneumoniae*.** (A) PMNs isolated from the bone marrow of C57BL/6 young WT mice were treated  
971 with 5µg/mL of Actinomycin D (Act.D) or 10µg/mL of Cycloheximide (CHX), or PBS (vehicle  
972 control) for 30 minutes at 37°C. Treated neutrophils were then infected with *S. pneumoniae* TIGR4  
973 pre-opsioned with homologous sera for 45 minutes at 37°C. Reactions were plated on blood agar  
974 plates and the percentage of bacteria killed compared to a no PMN control under the same  
975 condition was calculated. Positive percent killing indicates bacterial death while negative percent  
976 indicates bacterial growth. (B) PMNs isolated from the bone marrow of C57BL/6 young WT, old  
977 WT and CD73KO mice were infected with *S. pneumoniae* TIGR4 pre-opsioned with homologous  
978 sera for 45 minutes at 37°C. Reactions were plated on blood agar plates and the percentage of  
979 bacteria killed compared to a no PMN control under the same condition was calculated for each  
980 strain. (A and B) Data shown are pooled from six separate experiments (n=6 biological replicates)  
981 where each condition was tested in triplicate (n=3 technical replicates) per experiment. Asterisks  
982 indicate significant differences between the indicated groups as calculated by Student's t-test.

983

984

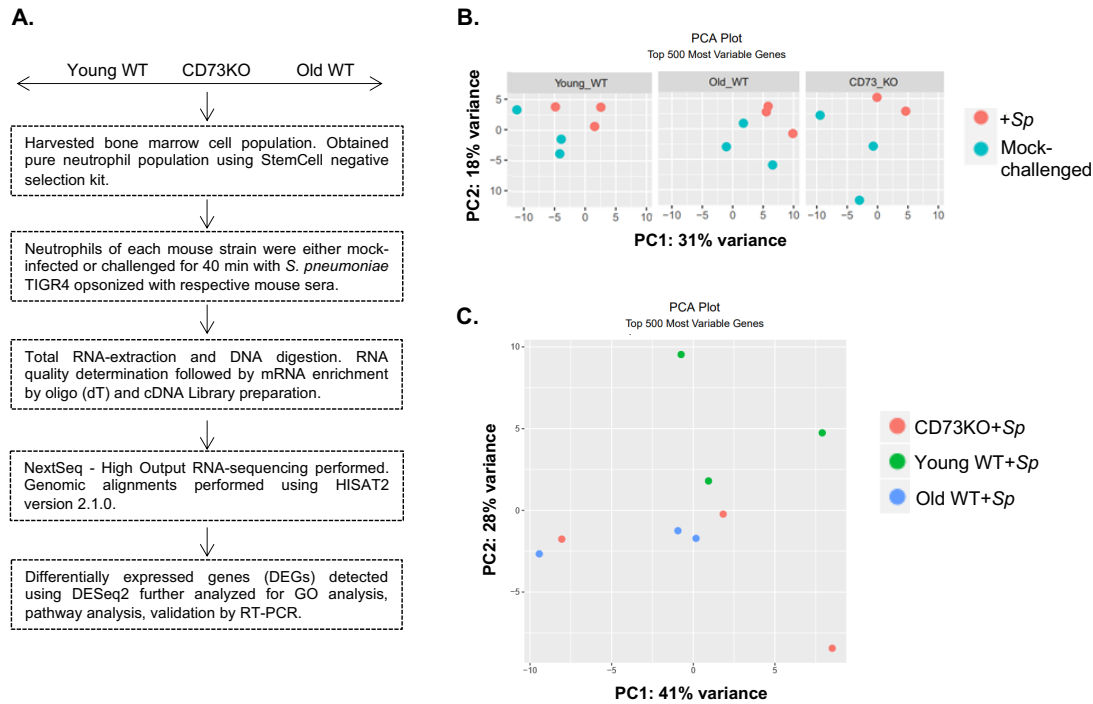

985

986 **Figure 2. RNA sequencing experimental approach.** (A) Schematic diagram of PMN isolation,  
987 sample preparation, and RNA sequencing analysis. (B and C) Principal component analysis (PCA)  
988 plot showing variance in mRNA expression (post data normalization) in un-infected or *S.*  
989 *pneumoniae* challenged samples, presented as separate plots for each mouse strain (B) or all  
990 infected samples on the same plot (C).

991

992

993

994

995

996

997

998

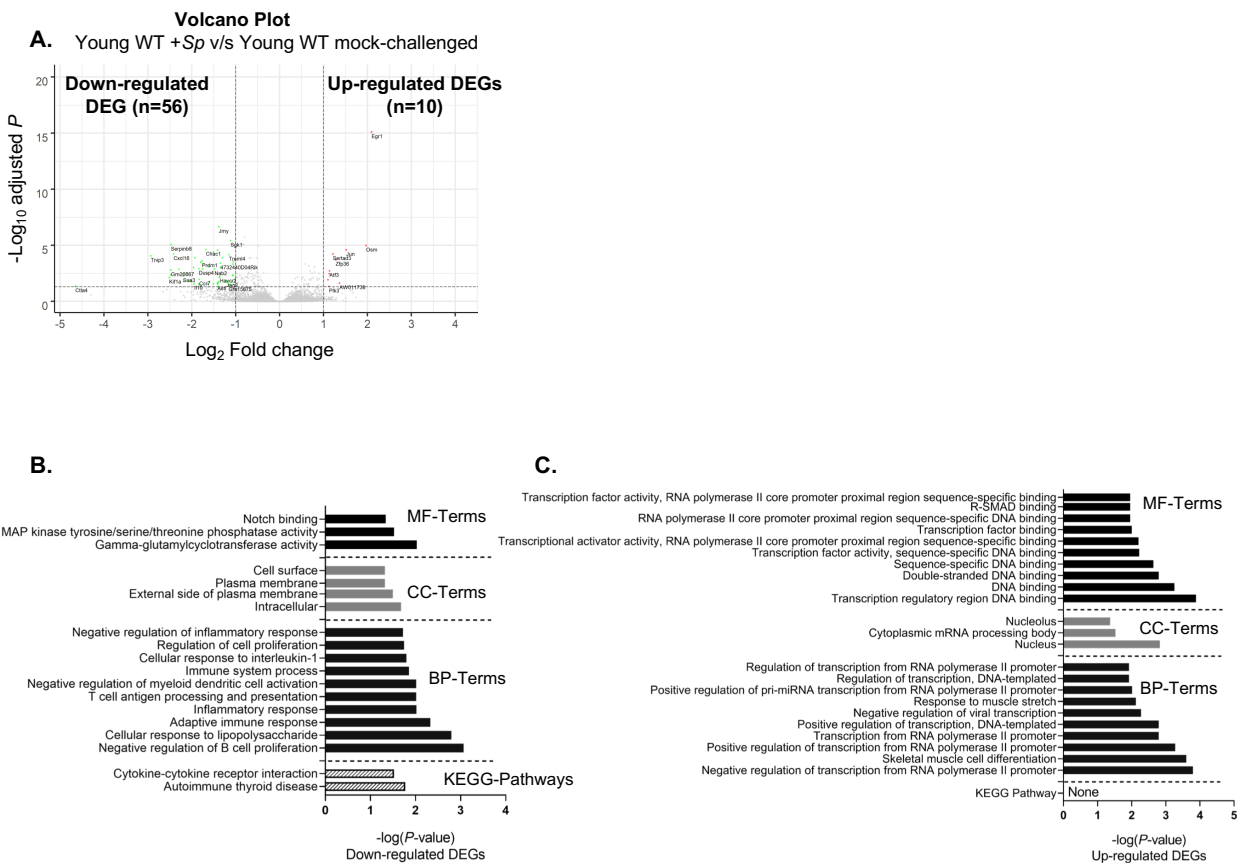

999

1000 **Figure 3. Analysis of differentially expressed genes in PMNs from young WT mice in response**  
 1001 **to *S. pneumoniae* infection.** (A) Volcano plot representing differential gene expression (DEG)  
 1002 (FDR <0.05) in PMNs isolated from the bone marrow of young WT mice in response to *ex vivo*  
 1003 challenge with *S. pneumoniae* TIGR4 compared to mock-challenged control. Genes marked in  
 1004 green represent significantly down-regulated DEGs ( $\log_2FC \leq -1.0$ , FDR < 0.05) and genes  
 1005 marked in red represent significantly up-regulated DEGs ( $\log_2FC \geq 1.0$ , FDR < 0.05). (B and C)  
 1006 Gene Ontology (GO) enrichment analysis using DAVID indicating the top 10 significant ( $p \leq 0.05$ )  
 1007 Biological Process (BP), Molecular Function (MF), Cellular Component (CC) and KEGG  
 1008 Pathway terms for significantly down-regulated DEGs (B) and significantly up-regulated DEGs  
 1009 (C).

1010

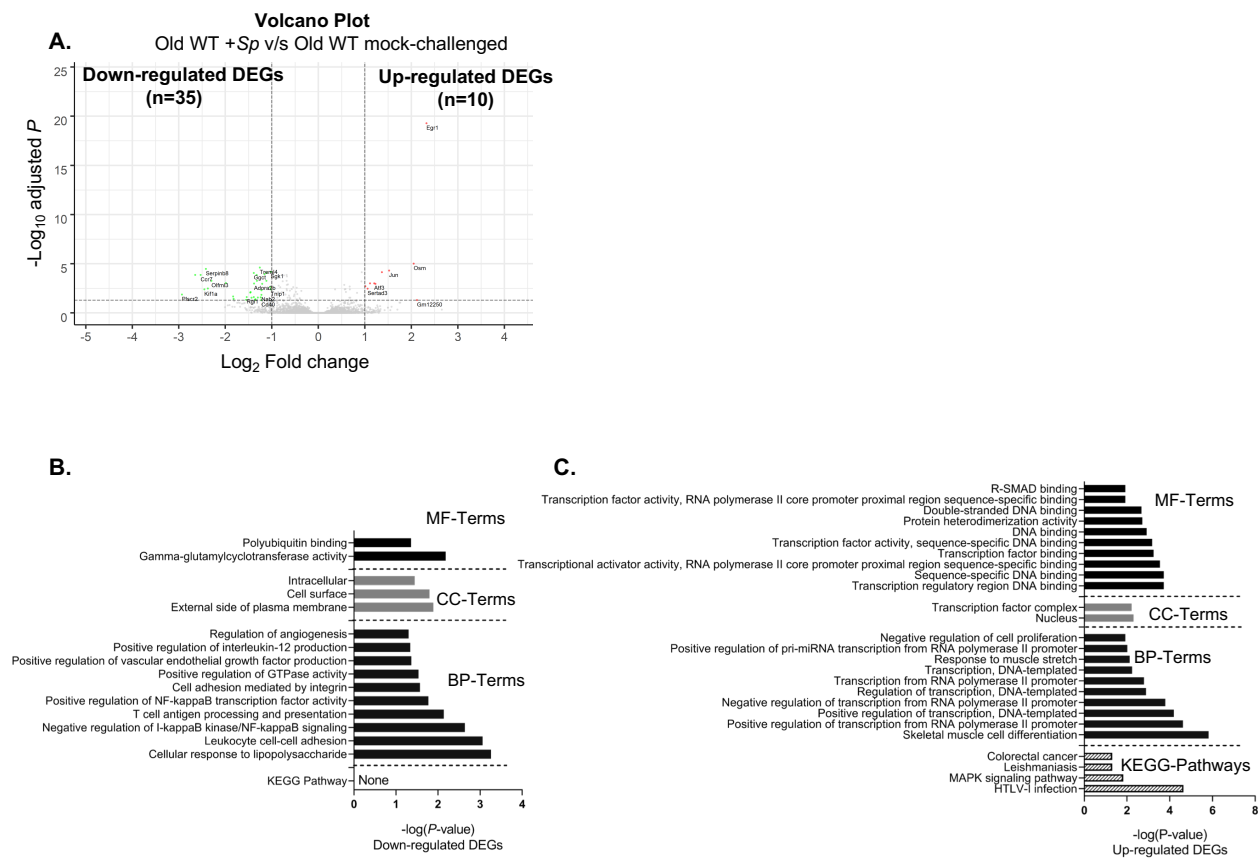

1011

1012 **Figure 4. Analysis of differentially expressed genes in PMNs from old WT mice in response**

1013 **to *S. pneumoniae* infection.** (A) Volcano plot representing differential gene expression (DEG)

1014 (FDR <0.05) in PMNs isolated from the bone marrow of old WT mice in response to *ex vivo*

1015 infection with *S. pneumoniae* TIGR4 compared to mock-infected control. Genes marked in green

1016 represent significantly down-regulated DEGs ( $\log_2FC \leq -1.0$ , FDR < 0.05) and genes marked in

1017 red represent significantly up-regulated DEGs ( $\log_2FC \geq 1.0$ , FDR < 0.05). (B and C) Gene

1018 Ontology (GO) enrichment analysis using DAVID indicating the top 10 significant ( $p \leq 0.05$ )

1019 Biological Process (BP), Molecular Function (MF), Cellular Component (CC) and KEGG

1020 Pathway terms for significantly down-regulated DEGs (B) and significantly up-regulated DEGs

1021 (C).

1022

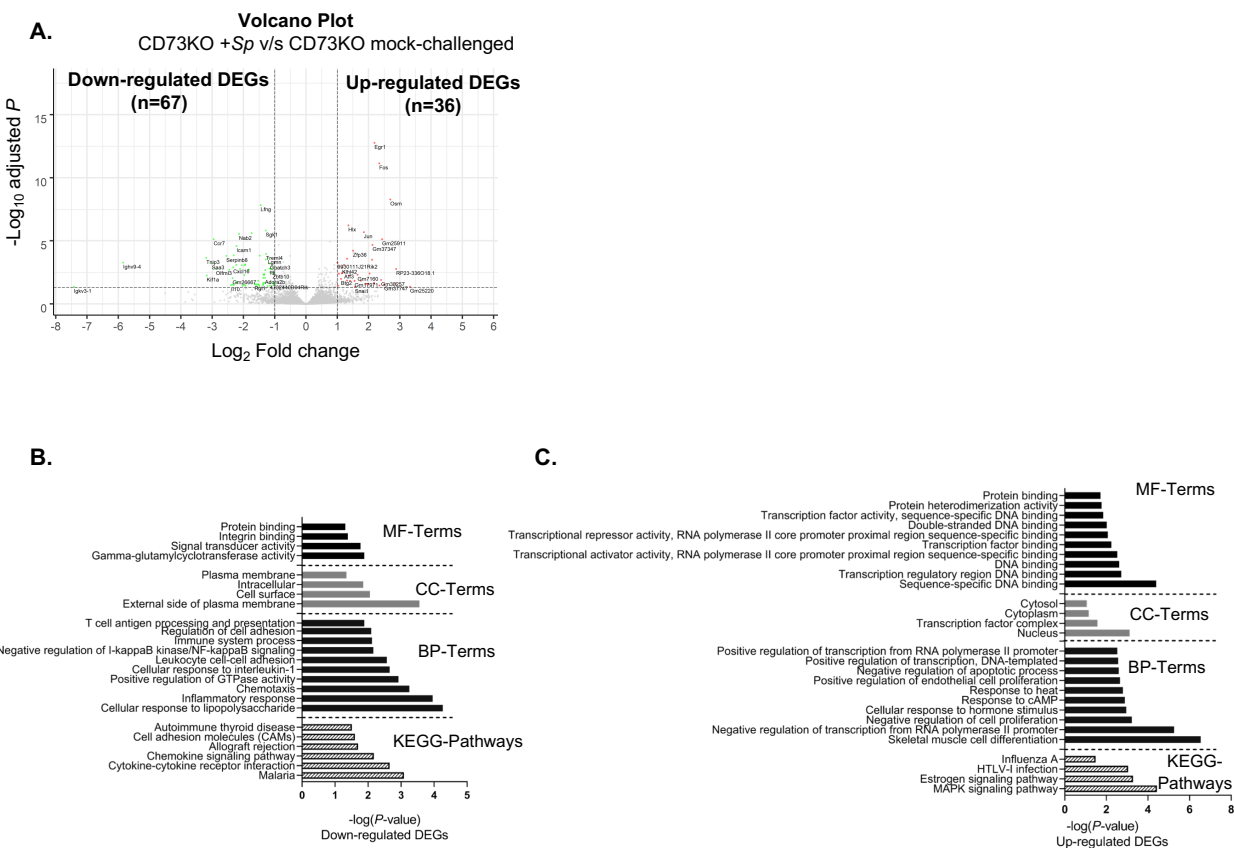

1023

1024 **Figure 5. Analysis of differentially expressed genes in PMNs from young CD73KO mice in**

1025 **response to *S. pneumoniae* infection. (A) Volcano plot representing differential gene expression**

1026 **(DEG) (FDR <0.05) in PMNs isolated from the bone marrow of CD73KO mice in response to *ex***

1027 ***in vivo* challenge with *S. pneumoniae* TIGR4 compared to mock-infected control. Genes marked in**

1028 **green represent significantly down-regulated DEGs ( $\log_2FC \leq -1.0$ , FDR < 0.05) and genes**

1029 **marked in red represent significantly up-regulated DEGs ( $\log_2FC \geq 1.0$ , FDR < 0.05). (B and C)**

1030 **Gene Ontology (GO) enrichment analysis using DAVID indicating the top 10 significant ( $p \leq 0.05$ )**

1031 **Biological Process (BP), Molecular Function (MF), Cellular Component (CC) and KEGG**

1032 **Pathway terms for significantly down-regulated DEGs (B) and significantly up-regulated DEGs**

1033 **(C).**

1034



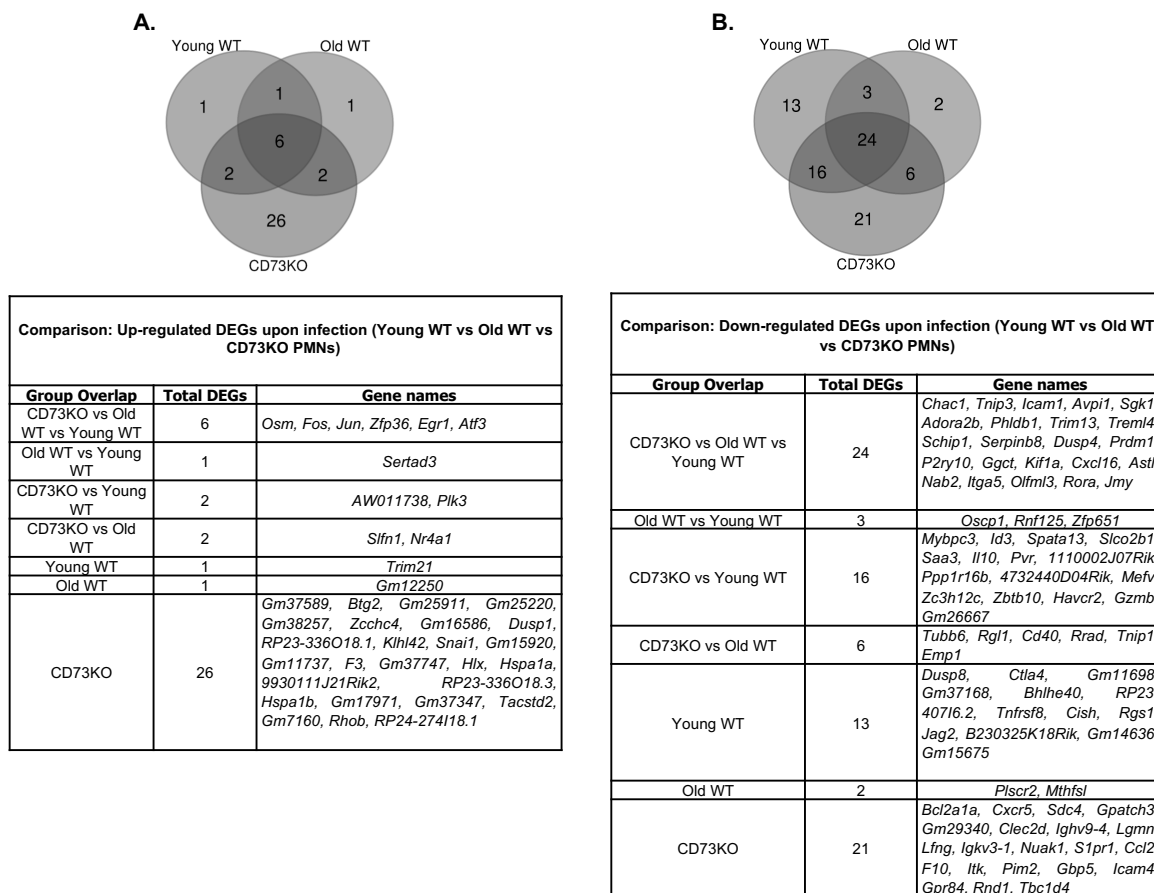

1035

1036 **Figure 6. Venn diagrams showing distribution of significantly up-regulated or down-**

1037 **regulated genes across host groups in response to *S. pneumoniae* infection. Distribution of**

1038 **significantly up-regulated ( $\log_2FC \geq 1.0$ ,  $FDR < 0.05$ ) (A) and significantly down-regulated**

1039 **( $\log_2FC \leq -1.0$ ,  $FDR < 0.05$ ) (B) DEGs in PMNs from young WT vs old WT vs CD73KO mice**

1040 **upon pneumococcal challenge.**

1041

1042

1043

1044

1045



1060

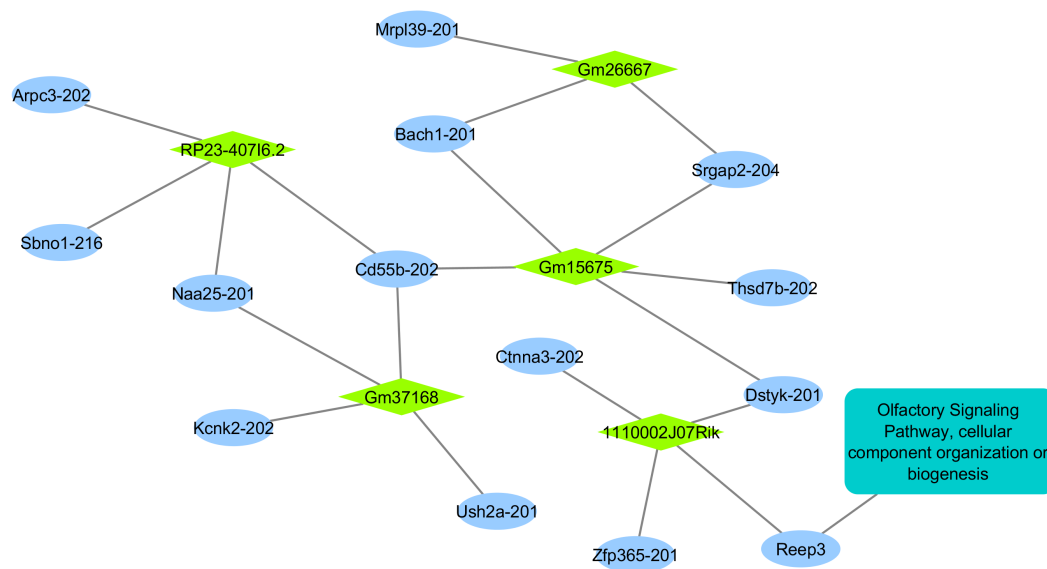

1061

1062 **Figure 8. Young WT PMN specific lncRNA-target network and biological process.** In the

1063 network, green diamonds represent the down-regulated lncRNAs in young WT PMNs in response

1064 to *S. pneumoniae* infection. Blue ovals are predicted gene targets for the lncRNAs. The big

1065 rectangle represents the predicted significantly impacted biological pathway.

1066

1067

1068

1069

1070

1071

1072

1073

1074

1075

1076

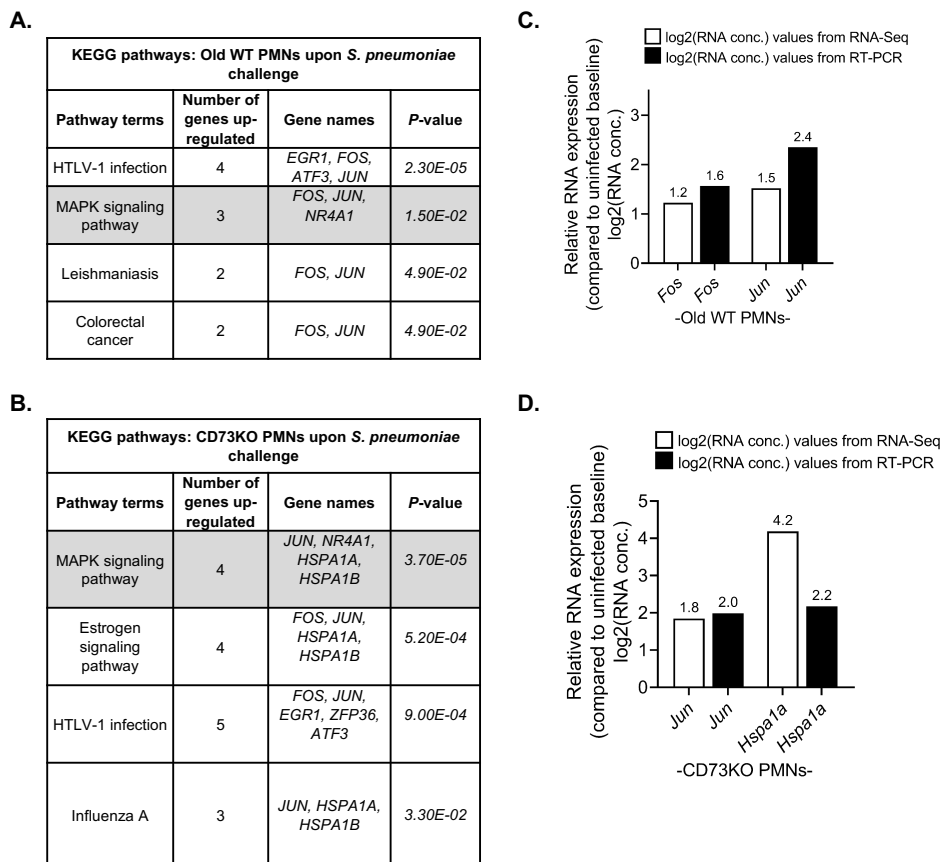

1077

1078 **Figure 9. Validation of MAPK signaling pathway differentially expressed genes by real-time**  
 1079 **PCR.** Lists of KEGG pathways and the corresponding genes retrieved from DAVID software  
 1080 using significantly up-regulated DEGs ( $\log_2FC \geq 1.0$ ,  $FDR < 0.05$ ) in PMNs isolated from the  
 1081 bone marrow of old WT (A) or CD73KO (B) mice in response to infection with *S.*  
 1082 *pneumoniae* TIGR4 compared to mock-infected control are shown. Expression of select up-  
 1083 regulated DEGs corresponding to MAPK signaling pathway identified during RNA sequencing  
 1084 (white bars) was validated by RT-PCR (black bars) for old WT (C) and CD73KO PMNs (D). The  
 1085 data shown are the  $\log_2$  value of the average of fold change values of target mRNA expression in  
 1086 infected samples relative to mock-infected controls. Relative fold change in target mRNA  
 1087 expression was calculated using three separate biological samples. Data were analyzed by the

1088 comparative threshold cycle ( $2^{-\Delta\Delta CT}$ ) method, normalizing the CT values obtained for target  
1089 gene expression to those for GAPDH of the same sample.

1090

1091

1092

1093

1094

1095

1096

1097

1098

1099

1100

1101

1102

1103

1104

1105

1106

1107

1108

1109

1110

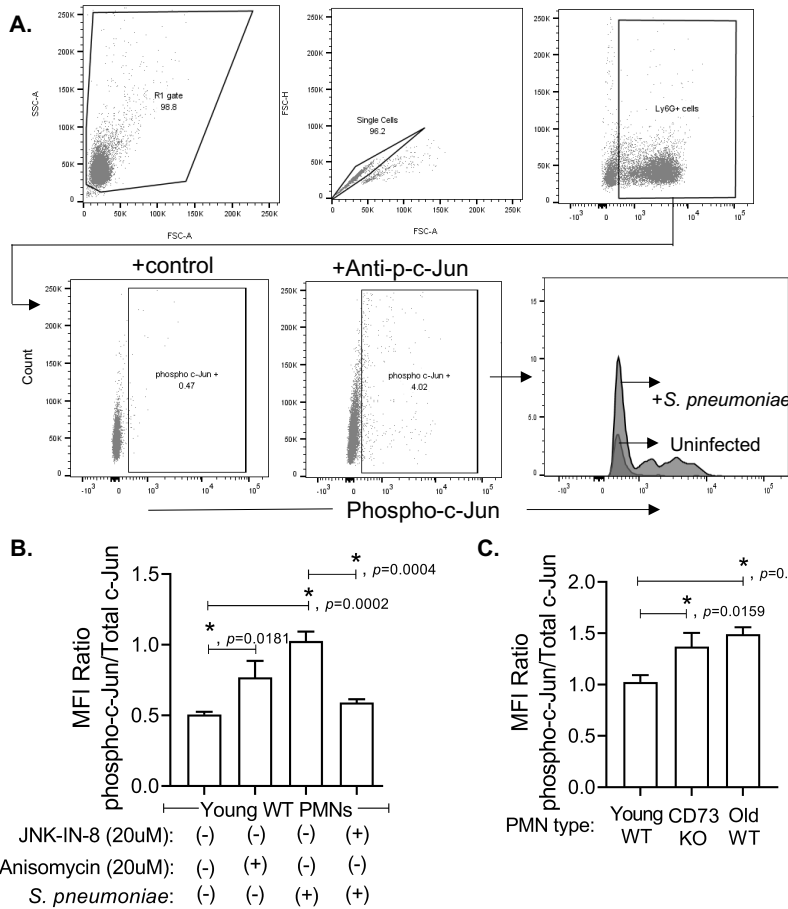

1112 **Figure 10. Phosphorylated c-Jun pools are higher in PMNs from old and CD73KO mice**  
 1113 **following *S. pneumoniae* infection.** PMNs isolated from the bone marrow of the indicated strains  
 1114 of mice were incubated for 30 minutes at 37°C with *S. pneumoniae* TIGR4 pre-opsionized with  
 1115 matching sera at a MOI of 4 or mock-treated (uninfected) with 3% matching mouse sera only.  
 1116 Flow cytometry was used to determine the effect of bacterial infection on phospho-c-Jun (Ser73)  
 1117 levels. (A) The panel shows the gating strategy followed during analysis of flow cytometry in  
 1118 young WT mice. We gated on PMNs (Ly6G<sup>+</sup> cells) and measured the expression (mean fluorescent  
 1119 intensity or MFI) of phospho-c-Jun (Ser73) and total-c-Jun. (B) PMNs from young WT mice were  
 1120 either mock-challenged, treated with Anisomycin (JNK/AP-1 pathway activator) or infected with  
 1121 *S. pneumoniae* in the absence or presence of JNK-IN-8 (JNK/AP-1 pathway inhibitor). The ratio

1122 of phosphorylated c-Jun with respect to the total cellular levels of c-Jun is presented. (C) PMNs  
1123 from young WT, old WT and CD73KO mice were infected with *S. pneumoniae* and the ratio of  
1124 phosphorylated c-Jun with respect to the total cellular levels of c-Jun was compared.  
1125 Representative data (B and C) from one of five separate experiments where each condition was  
1126 tested in triplicate (n=3 technical replicates) per experiment are shown. Asterisks indicate  
1127 significant differences as calculated by Student's t-test.

1128

1129

1130

1131

1132

1133

1134

1135

1136

1137

1138

1139

1140

1141

1142

1143

1144

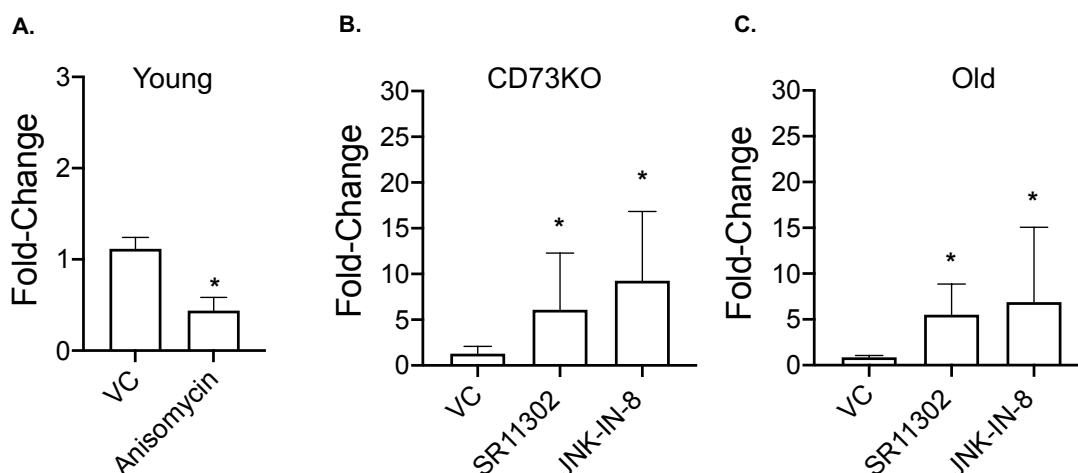

1145

1146 **Figure 11. Blocking JNK/AP-1 pathway boosts the antimicrobial function of PMNs isolated**  
1147 **from CD73KO and old WT mice.** PMNs isolated from the bone marrow of young WT (A),  
1148 CD73KO (B) and old WT (C) mice were treated with the indicated JNK-stimulator Anisomycin  
1149 (20 $\mu$ M), JNK-inhibitor JNK-IN-8 (20 $\mu$ M), AP-1 inhibitor SR11302 (20 $\mu$ M) or HBSS+ (VC) for  
1150 30 minutes at 37°C. Treated PMNs were then challenged with *S. pneumoniae* TIGR4 strain pre-  
1151 opsonized with homologous sera for 45 minutes at 37°C. Reactions were plated on blood agar  
1152 plates and the percentage of bacteria killed compared to a no PMN control under the same  
1153 condition was calculated. The fold-change in bacterial killing with respect to controls was then  
1154 calculated by dividing the value of the treatment group by the vehicle control for each strain. Data  
1155 shown are pooled from three separate experiments (n=3 biological replicates) where each  
1156 condition was tested in triplicate (n=3 technical replicates) per experiment. Asterisks indicate  
1157 significantly different from 1 by one-sample t-test.



**Table I.** Differentially expressed genes in mock-challenged PMNs from old WT mice compared to young WT mice.

| <b>Old_WT_SpNeg_vs_Young_WT_Sp<br/>Neg (As Base)</b> | <b>Log2FoldChange</b> | <b>P-Value</b> | <b>Padj (FDR)</b> |
|------------------------------------------------------|-----------------------|----------------|-------------------|
| Ighv2-9                                              | 5.324005446           | 4.76E-05       | 0.044462976       |
| Igkv4-91                                             | 5.232587656           | 5.49E-05       | 0.049161656       |
| Igkv4-79                                             | 5.05316031            | 4.04E-05       | 0.042456147       |
| Igkv8-19                                             | 4.536847197           | 3.60E-09       | 1.11E-05          |
| Ighv14-3                                             | 4.456074702           | 4.35E-05       | 0.042456147       |
| Igkv12-89                                            | 3.968347624           | 2.66E-08       | 6.36E-05          |
| Igkv14-126                                           | 3.631253191           | 7.12E-13       | 3.83E-09          |
| Ighv11-2                                             | 3.557189056           | 2.33E-26       | 5.02E-22          |
| Calca                                                | 3.212945532           | 4.51E-14       | 3.23E-10          |
| Igkv6-15                                             | 3.135262255           | 2.49E-07       | 0.000485531       |
| Igkv8-27                                             | 3.022666053           | 4.31E-05       | 0.042456147       |
| Ighv5-6                                              | 2.975616563           | 8.41E-06       | 0.012907276       |
| Gata3                                                | 2.949808135           | 7.68E-10       | 2.75E-06          |

|               |             |          |             |
|---------------|-------------|----------|-------------|
| Ighv1-53      | 2.750705075 | 4.67E-10 | 2.01E-06    |
| Igha          | 2.691611019 | 6.17E-15 | 6.63E-11    |
| Igkv6-32      | 2.666982201 | 2.17E-05 | 0.027412136 |
| Ighv5-17      | 2.381609479 | 1.09E-07 | 0.000233962 |
| Mt2           | 2.296737618 | 2.84E-06 | 0.005077141 |
| Ly6a          | 2.155448841 | 1.31E-05 | 0.01870331  |
| C130026I21Rik | 1.641618531 | 1.54E-05 | 0.020715214 |
| Ces1d         | 1.384138134 | 3.24E-06 | 0.005347714 |
| Rn18s-rs5     | 1.077561976 | 2.60E-05 | 0.031055339 |
| Col5a1        | 1.060211245 | 2.48E-08 | 6.36E-05    |

1

---

<sup>1</sup> List of differentially expressed (DE) genes ( $\log_2FC \geq 1.0$  or  $\log_2FC \leq -1.0$ ,  $FDR < 0.05$ ) in mock-challenged PMNs from old WT mice compared to mock-infected PMNs from young WT mice.

**Table II.** Differentially expressed genes in mock-challenged PMNs from CD73KO mice compared to young WT mice.

| <b>CD73KO_SpNeg_vs_Young_WT_Sp<br/>Neg (As Base)</b> | <b>Log2FoldChange</b> | <b>P-Value</b> | <b>Padj (FDR)</b> |
|------------------------------------------------------|-----------------------|----------------|-------------------|
| Gm11868                                              | 5.382471685           | 4.98E-30       | 3.69E-26          |
| Ighv9-4                                              | 5.305558233           | 1.53E-06       | 2.84E-03          |
| Gm13456                                              | 2.127675061           | 1.06E-32       | 1.57E-28          |
| Gm6548                                               | 1.275332385           | 2.14E-07       | 4.52E-04          |
| Fam63b                                               | -1.142265331          | 5.00E-21       | 2.47E-17          |
| Aqp9                                                 | -1.14542389           | 8.13E-06       | 1.20E-02          |
| Cyb5r4                                               | -1.393240659          | 9.15E-17       | 2.71E-13          |
| Nt5e                                                 | -2.880728481          | 2.53E-18       | 9.39E-15          |

---

<sup>1</sup> List of differentially expressed (DE) genes ( $\log_2FC \geq 1.0$  or  $\log_2FC \leq -1.0$ ,  $FDR < 0.05$ ) in mock-challenged CD73KO PMNs compared to mock-infected WT PMNs from young mice.

**Table III.** Down-regulated KEGG pathways in PMNs isolated from young WT or CD73KO mice in response to *S. pneumoniae* infection.

| Downregulated KEGG pathways: Young WT PMNs upon <i>S. pneumoniae</i> challenge |                 |                                                                     |                 | Downregulated KEGG pathways: CD73KO PMNs upon <i>S. pneumoniae</i> challenge |                                                                                               |                 |
|--------------------------------------------------------------------------------|-----------------|---------------------------------------------------------------------|-----------------|------------------------------------------------------------------------------|-----------------------------------------------------------------------------------------------|-----------------|
| Pathway terms                                                                  | Number of genes | Gene names                                                          | <i>P</i> -value | Number of genes                                                              | Gene names                                                                                    | <i>P</i> -value |
| Auto-immune thyroid disorder                                                   | 3               | <i>CTLA4</i> ,<br><i>GZMB</i> , <i>IL10</i>                         | 1.70E-02        | 3                                                                            | <i>GZMB</i> , <i>CD40</i> ,<br><i>IL10</i>                                                    | 3.1E-02         |
| Cytokine-cytokine receptor interaction                                         | 4               | <i>CCR7</i> ,<br><i>CXCL16</i> ,<br><i>TNFRSF8</i> ,<br><i>IL10</i> | 3.0E-02         | 6                                                                            | <i>CCR7</i> , <i>CCL2</i> ,<br><i>CXCR5</i> ,<br><i>CXCL16</i> ,<br><i>CD40</i> , <i>IL10</i> | 2.20E-03        |
| Malaria                                                                        |                 |                                                                     |                 | 4                                                                            | <i>ICAM1</i> ,<br><i>CCL2</i> , <i>CD40</i> ,<br><i>IL10</i>                                  | 8.20E-04        |
| Chemokine signaling pathway                                                    |                 |                                                                     |                 | 5                                                                            | <i>ITK</i> , <i>CCR7</i> ,<br><i>CCL2</i> ,<br><i>CXCR5</i> ,<br><i>CXCL16</i>                | 6.7E-03         |
| Allograft rejection                                                            |                 |                                                                     |                 | 3                                                                            | <i>GZMB</i> , <i>CD40</i> ,<br><i>IL10</i>                                                    | 2.0E-02         |
| Cell adhesion molecules (CAMs)                                                 |                 |                                                                     |                 | 4                                                                            | <i>PVR</i> , <i>ICAM1</i> ,<br><i>CD40</i> , <i>SDC4</i>                                      | 2.5E-02         |

1

<sup>1</sup> Significantly ( $p \leq 0.05$ ) down-regulated KEGG pathways with genes involved and *p*-values based upon DAVID analysis of significantly down-regulated DEGs ( $\log_2FC \geq 1.0$ ,  $FDR < 0.05$ ) in PMNs isolated from young WT or CD73KO mice in response to *S. pneumoniae* TIGR4 infection compared to mock-challenged controls.
